# Supplementary material for: Aerobic oxidative C–C bond formation through C–H bond activation catalysed by flavin and iodine
Source: Royal Society of Chemistry journal article supplement (doi:10.1039/d4ob01317d), 2024-01-01
Supplement: d4ob01317d1.pdf [file d4ob01317d1.pdf]

Supplementary Information

**Aerobic oxidative C–C bond formation through C–H bond activation  
catalysed by flavin and iodine**

Hazuki Miyake, Nico Ishige, Hayaki Okai and Hiroki Iida\*

Department of Chemistry, Graduate School of Natural Science and Technology,  
Shimane University, 1060 Nishikawatsu, Matsue, 690-8504, Japan

E-mail address: iida@riko.shimane-u.ac.jp

|                                                                                  |     |
|----------------------------------------------------------------------------------|-----|
| 1. General                                                                       | S2  |
| 2. Materials                                                                     | S2  |
| 3. Experimental Procedures                                                       | S4  |
| 4. $^1\text{H}$ and $^{13}\text{C}\{^1\text{H}\}$ NMR Spectra of Novel Compounds | S11 |
| 5. $^1\text{H}$ NMR Spectra of Known Compounds                                   | S13 |
| 6. References                                                                    | S25 |

## 1. General

Melting points (M.p.) were determined on a SANSYO SMP-300 (SANSYO, Tokyo, Japan) and are uncorrected. The IR spectra were recorded on a JASCO FT/IR-660plus spectrophotometer (JASCO, Tokyo, Japan). The NMR spectra were measured using a JEOL JNM ECX-500 spectrometer (JEOL, Akishima, Japan) operating at 500 MHz for  $^1\text{H}$  and 126 MHz for  $^{13}\text{C}$  using tetramethylsilane (TMS) or a solvent residual peak as the internal standard. The electrospray ionization mass (ESI-MS) spectra were recorded on a Bruker microTOFII mass spectrometer (Bruker, Billerica, MA) using the positive or negative mode ESI-TOF method for acetonitrile solutions and sodium formate as the reference.

## 2. Materials

Riboflavin tetraacetate (**10b**),<sup>S1</sup> 5-ethyl-10-(2-hydroxyethyl)-3,7,8-trimethylisoalloxazinium triflate (**11a•TfO**),<sup>S2</sup> 5-ethyl-10-(2-hydroxyethyl)-7,8-dimethylisoalloxazinium triflate (**11b•TfO**),<sup>S2</sup> 5-ethyl-1,3,7,8-tetramethylalloxazinium triflate (**12a•TfO**),<sup>S2</sup> 5-ethyl-1,3-dimethylalloxazinium triflate (**12b•TfO**),<sup>S2</sup> 5-ethyl-1,3-dimethyl-8-trifluoromethylalloxazinium triflate (**12c•TfO**),<sup>S2</sup> 1,10-ethylene-3,7,8-trimethylisoalloxazinium chloride (**13a•Cl**),<sup>S3</sup> 1,10-ethylene-7,8-dimethylisoalloxazinium chloride (**13b•Cl**),<sup>S4</sup> 1,10-ethylene-3-methylisoalloxazinium chloride (**13c•Cl**),<sup>S5</sup> 1,10-ethylene-3-methyl-7-trifluoromethylalloxazinium chloride (**13d•Cl**),<sup>S6</sup> and 1,10-ethylene-3,7,8-trimethylisoalloxazinium triflate (**13a•TfO**)<sup>S2</sup> were synthesized according to the previously reported methods. Tetrahydroisoquinolines **1a-c**,<sup>S7</sup> **f**,<sup>S7</sup> **d**,<sup>S8</sup> **e**,<sup>S8</sup> **h**<sup>S9</sup> and tetrahydroisoquinolinylacetate **6**<sup>S10</sup> were synthesized according to the previously reported method (Chart S1). Other starting materials including dimethylmalonate **2s** were purchased from Aldrich (Milwaukee, WI), FUJIFILM Wako Pure Chemical Corporation (Osaka, Japan), Nacalai tesque (Kyoto, Japan), and Tokyo Kasei (TCI, Tokyo, Japan) and were used as received.

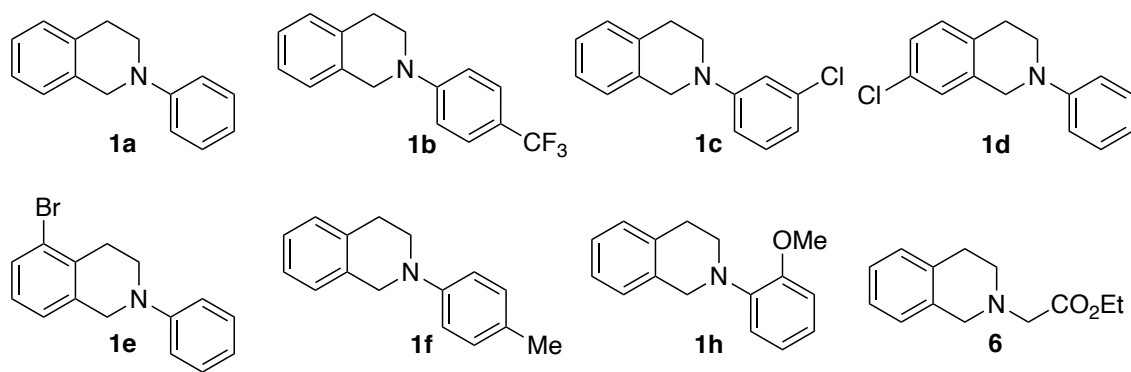

**Chart S1.** Structures of tetrahydroisoquinolines **1s** and tetrahydroisoquinolinylacetate **6**.

### 3. Experimental Procedures

#### Optimization of the reaction condition for the aerobic CDC between **1a** and **2a**.

The effect of solvents, temperature, iodine sources, catalyst quantity, and reaction time on the aerobic CDC of **1a** and **2a** was investigated as shown in Table S1.

**Table S1.** Effect of solvents, temperature, iodine sources, catalyst quantity, and reaction time<sup>a</sup>

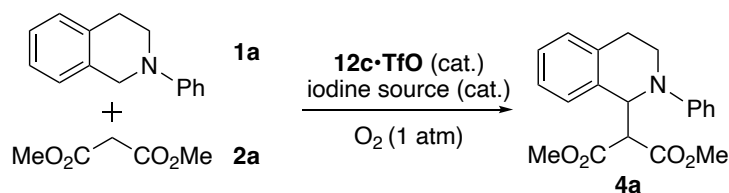

| Entry | <b>2a</b> (eq.) | Solvent                  | Iodine                      | Flavin (mol%) | Temperature (°C) | Time (h) | Yield (%)       |
|-------|-----------------|--------------------------|-----------------------------|---------------|------------------|----------|-----------------|
| 1     | 3               | CH <sub>3</sub> CN (0.5) | I <sub>2</sub> (5 mol%)     | 5             | 40               | 18       | 60              |
| 2     | 3               | DMF (0.5)                | I <sub>2</sub> (5 mol%)     | 5             | 40               | 18       | 19              |
| 3     | 3               | pyridine (0.5)           | I <sub>2</sub> (5 mol%)     | 5             | 40               | 18       | 20              |
| 4     | 3               | CHCl <sub>3</sub> (0.5)  | I <sub>2</sub> (5 mol%)     | 5             | 40               | 18       | 61              |
| 5     | 3               | AcOEt (0.5)              | I <sub>2</sub> (5 mol%)     | 5             | 40               | 18       | 44              |
| 6     | 3               | dioxane (0.5)            | I <sub>2</sub> (5 mol%)     | 5             | 40               | 18       | 58              |
| 7     | 3               | MeOH (0.5)               | I <sub>2</sub> (5 mol%)     | 5             | 40               | 18       | 33              |
| 8     | 3               | <i>t</i> -BuOH (0.5)     | I <sub>2</sub> (5 mol%)     | 5             | 40               | 18       | 55              |
| 9     | 3               | -                        | I <sub>2</sub> (5 mol%)     | 5             | 40               | 18       | 68              |
| 10    | 8.7             | -                        | I <sub>2</sub> (5 mol%)     | 5             | 40               | 18       | 73              |
| 11    | 8.7             | -                        | I <sub>2</sub> (5 mol%)     | 5             | 25               | 18       | 52              |
| 12    | 8.7             | -                        | I <sub>2</sub> (5 mol%)     | 5             | 60               | 18       | 80              |
| 13    | 8.7             | -                        | KI (10 mol%)                | 5             | 40               | 18       | 19              |
| 14    | 8.7             | -                        | NH <sub>4</sub> I (10 mol%) | 5             | 40               | 18       | 46              |
| 15    | 8.7             | -                        | HI (10 mol%)                | 5             | 40               | 18       | 68              |
| 16    | 8.7             | -                        | I <sub>2</sub> (5 mol%)     | 2             | 40               | 18       | 58              |
| 17    | 8.7             | -                        | I <sub>2</sub> (5 mol%)     | 5             | 40               | 24       | 74              |
| 18    | 8.7             | -                        | I <sub>2</sub> (5 mol%)     | 5             | 40               | 32       | 75              |
| 19    | 8.7             | -                        | I <sub>2</sub> (5 mol%)     | 5             | 40               | 48       | 78              |
| 20    | 8.7             | -                        | I <sub>2</sub> (5 mol%)     | 5             | 40               | 48       | 79 <sup>b</sup> |

<sup>a</sup>Conditions: **1a** (0.3 mmol), **2a**, **12c•TfO**, iodine source, and solvent under O<sub>2</sub> (1 atm). Yield was determined by <sup>1</sup>H NMR using 1,3,5-trioxane as an internal standard. <sup>b</sup>Under air (1 atm, balloon).

**Effects of catalyst on the catalytic activity of the reaction of 6 with 7.** We examined the catalytic activity of the flavin catalysts for the reaction of 6 with 7 (Table S2). Among the seven flavins, **13a•TfO** showed the most efficient catalytic activity.

**Table S2.** Comparison with the catalytic activity of flavins for the reaction of 6 with 7<sup>a</sup>

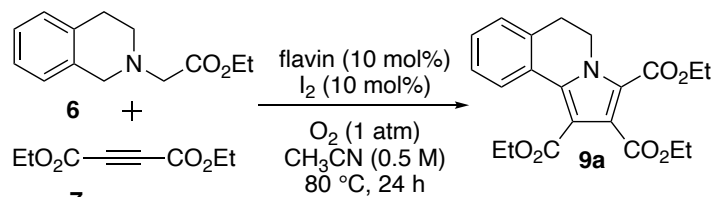

| Entry | Flavin (mol%)  | $E_1^b$ (V vs Fc/Fc <sup>+</sup> ) | Yield (%) |
|-------|----------------|------------------------------------|-----------|
| 1     | <b>11a•TfO</b> | -0.136                             | 8         |
| 2     | <b>11b•TfO</b> | -0.118                             | 9         |
| 3     | <b>12a•TfO</b> | -0.425                             | 8         |
| 4     | <b>12c•TfO</b> | -0.168                             | 29        |
| 5     | <b>13a•TfO</b> | -0.650                             | 36        |
| 6     | <b>13a•Cl</b>  | -0.650 <sup>c</sup>                | 27        |
| 7     | <b>13b•Cl</b>  | -0.608 <sup>c</sup>                | 13        |
| 8     | <b>13d•Cl</b>  | -0.426 <sup>c</sup>                | 22        |

<sup>a</sup>Conditions: **6** (0.3 mmol), **7** (1.5 eq.), flavin (10 mol%), and I<sub>2</sub> (10 mol%) under O<sub>2</sub> (1 atm) at 80 °C for 24 h. Yield was determined by <sup>1</sup>H NMR using 1,3,5-trimethoxybenzene as an internal standard. <sup>b</sup>From refs. S2, S11, and S12. <sup>c</sup>The TfO salts were used for electrochemical measurements.

### Spectroscopic data of products

Spectroscopic data of 2-(2-(4-(trifluoromethyl)-1,2,3,4-tetrahydroisoquinoline-1-yl)-malonic acid dimethyl ester (**4b**):<sup>S11</sup>

The yield was determined to be 87% by <sup>1</sup>H NMR measurement of

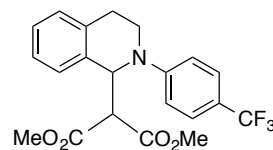

the reaction mixture. Column chromatography (SiO<sub>2</sub>, hexane/ethyl acetate/triethylamine = 94/1/5, v/v) afforded the desired product (111 mg, 90%) as a white solid. <sup>1</sup>H NMR (500 MHz, CDCl<sub>3</sub>, 25 °C, δ): 7.44 (d, J = 10.9 Hz, 2H), 7.24-7.12 (m, 4H), 7.01 (d, J = 11.1 Hz, 2H), 5.81 (d, J = 11.8 Hz, 1H), 3.90 (d, J = 11.7 Hz, 1H), 3.76-3.70 (m, 1H), 3.68 (s, 3H), 3.62-3.55 (m, 1H), 3.50 (s, 3H), 3.11-2.99 (m, 2H). <sup>13</sup>C {<sup>1</sup>H} NMR (126 MHz, CDCl<sub>3</sub>, 25 °C, δ): 168.2, 167.3, 150.8, 135.6, 134.6, 128.9, 128.2, 127.1, 126.5, 126.0, 119.6 (q, J = 133 Hz), 113.3, 59.0, 57.6, 52.8, 42.6, 26.6.

Spectroscopic data of 2-(2-(3-chlorophenyl)-1,2,3,4-tetrahydroisoquinoline-1-yl)-malonic acid dimethyl ester (**4c**):<sup>S11</sup>

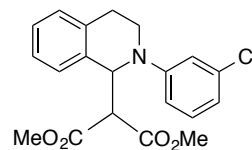

The yield was determined to be 94% by <sup>1</sup>H NMR measurement of the reaction mixture. Column chromatography (SiO<sub>2</sub>, hexane/ethyl acetate = 30/1) afforded the desired product (92.4 mg, 82%) as a colorless oil. <sup>1</sup>H NMR (500 MHz, CDCl<sub>3</sub>, 25 °C, δ): 7.22-7.19 (m, 2H), 7.16-7.11 (m, 3H), 6.92 (t, J = 2.2 Hz, 1H), 6.88 (dd, J = 8.4, 2.3 Hz, 1H), 6.73-6.71 (m, 1H), 5.67 (d, J = 9.5 Hz, 1H), 3.91 (d, J = 9.5 Hz, 1H), 3.70-3.65 (m, 4H), 3.58-3.53 (m, 4H), 3.11-3.05 (m, 1H), 2.94 (dt, J = 16.4, 5.7 Hz, 1H). <sup>13</sup>C{<sup>1</sup>H} NMR (126 MHz, CDCl<sub>3</sub>, 25 °C, δ): 168.2, 167.3, 149.8, 135.5, 135.1, 134.7, 130.2, 129.0, 128.0, 127.2, 126.4, 118.3, 114.5, 113.0, 59.1, 58.0, 52.8, 42.5, 26.3.

Spectroscopic data of 2-(7-chloro-2-phenyl-1,2,3,4-tetrahydroisoquinoline-1-yl)-malonic acid dimethyl ester (**4d**): The yield was determined to be 81% by <sup>1</sup>H NMR measurement of the

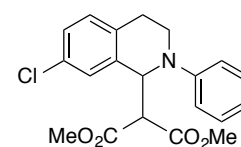

reaction mixture. Column chromatography (SiO<sub>2</sub>, hexane/ethyl acetate = 30/1 to 10/1, v/v) afforded the desired product (70.7 mg, 63%) as a colorless oil. IR (neat, cm<sup>-1</sup>): 2952, 2922, 1734, 1594, 1488, 1434, 1268, 945, 753. <sup>1</sup>H NMR (500 MHz, CDCl<sub>3</sub>, 25 °C, δ): 7.25-7.20 (m, 3H), 7.15 (dd, J = 8.2, 2.2 Hz, 1H), 7.04 (d, J = 8.2 Hz, 1H), 6.96 (d, J = 8.0 Hz, 2H), 6.79 (t, J = 7.3 Hz, 1H), 5.63 (d, J = 9.5 Hz, 1H), 3.93 (d, J = 9.5 Hz, 1H), 3.70 (s, 3H), 3.66 (dd, J = 8.1, 4.8 Hz, 2H), 3.57 (s, 3H), 3.04-2.97 (m, 1H), 2.78 (dt, J = 16.7, 4.7 Hz, 1H). <sup>13</sup>C{<sup>1</sup>H} NMR (126 MHz, CDCl<sub>3</sub>, 25 °C, δ): 168.2, 167.2, 148.7, 137.3, 133.3, 131.6, 130.5, 129.3, 127.9, 127.2, 119.3, 115.7, 59.0, 58.0, 52.8, 52.7, 42.0, 25.4. Anal. Calcd for C<sub>20</sub>H<sub>20</sub>ClNO<sub>4</sub>: C, 64.26; H, 5.39; N, 3.75. Found: C, 64.07; H, 5.26; N, 3.94.

Spectroscopic data of 2-(5-bromo-2-phenyl-1,2,3,4-tetrahydroisoquinoline-1-yl)-malonic acid dimethyl ester (**4e**): The yield was determined to be 88% by <sup>1</sup>H NMR measurement of the reaction mixture. Column chromatography (SiO<sub>2</sub>, hexane/ethyl

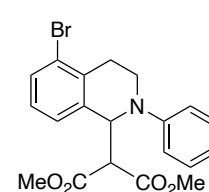

acetate = 20/1) afforded the desired product (33.6 mg, 54%) as a colorless oil. IR (neat, cm<sup>-1</sup>): 3025, 2952, 1732, 1596, 1436, 1267, 1146, 1030, 752. <sup>1</sup>H NMR (500 MHz, CDCl<sub>3</sub>, 25 °C, δ): 7.28 (s, 1H), 7.26-7.20 (m, 3H), 7.12 (d, J = 8.3 Hz, 1H), 6.95 (d, J = 8.0 Hz,

2H), 6.79 (t,  $J = 7.3$  Hz, 1H), 5.63 (d,  $J = 9.4$  Hz, 1H), 3.92 (d,  $J = 9.3$  Hz, 1H), 3.66-3.64 (m, 5H), 3.56 (s, 3H), 3.07-3.00 (m, 1H), 2.82 (dt,  $J = 16.7, 4.8$  Hz, 1H).  $^{13}\text{C}\{^1\text{H}\}$  NMR (126 MHz,  $\text{CDCl}_3$ , 25 °C,  $\delta$ ): 168.3, 167.3, 148.7, 137.3, 134.7, 132.0, 129.32, 129.28, 129.0, 121.6, 119.3, 115.7, 59.0, 57.9, 52.8, 41.9, 25.9. Anal. Calcd for  $\text{C}_{20}\text{H}_{20}\text{BrNO}_4$ : C, 57.43; H, 4.82; N, 3.35. Found: C, 57.05; H, 4.43; N, 3.54.

Spectroscopic data of 2-(2-*p*-tolyl-1,2,3,4-tetrahydroisoquinoline-1-yl)-malonic acid dimethyl ester (**4f**):<sup>S13</sup> The yield was determined to be 90% by  $^1\text{H}$  NMR measurement of the reaction mixture. Column chromatography ( $\text{SiO}_2$ , hexane/ethyl acetate = 30/1, v/v) afforded the

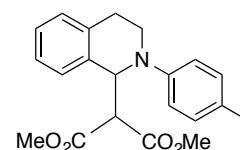

desired product (71.2 mg, 67%) as a pale yellow solid.  $^1\text{H}$  NMR (500 MHz,  $\text{CDCl}_3$ , 25 °C,  $\delta$ ): 7.20-7.14 (m, 2H), 7.10-7.07 (m, 2H), 7.01 (d,  $J = 8.5$  Hz, 2H), 6.89 (d,  $J = 8.7$  Hz, 2H), 5.61 (d,  $J = 9.5$  Hz, 1H), 3.96 (d,  $J = 9.4$  Hz, 1H), 3.69-3.59 (m, 5H), 3.57 (s, 3H), 3.07-3.01 (m, 1H), 2.79 (dt,  $J = 16.5, 4.7$  Hz, 1H), 2.22 (s, 3H).  $^{13}\text{C}\{^1\text{H}\}$  NMR (126 MHz,  $\text{CDCl}_3$ , 25 °C,  $\delta$ ): 168.4, 167.6, 146.8, 135.6, 134.9, 129.7, 129.2, 128.3, 127.6, 127.2, 126.0, 116.0, 59.2, 58.7, 52.64, 52.59, 42.4, 25.8, 20.4.

Spectroscopic data of 2-(2-phenyl-1,2,3,4-tetrahydroisoquinoline-1-yl)-malonic acid diethyl ester (**4g**):<sup>S9</sup> The yield was determined to be 82% by  $^1\text{H}$  NMR measurement of the reaction mixture. Column chromatography ( $\text{SiO}_2$ , hexane/ethyl acetate = 30/1 to 20/1, v/v) afforded the desired product (64.1 mg, 58%) as a colorless oil.  $^1\text{H}$  NMR (500 MHz,  $\text{CDCl}_3$ , 25 °C,  $\delta$ ):

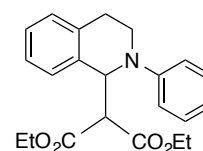

7.26-7.09 (m, 6H), 6.98 (d,  $J = 8.0$  Hz, 2H), 6.74 (t,  $J = 7.2$  Hz, 1H), 5.72 (d,  $J = 9.2$  Hz, 1H), 4.18-3.94 (m, 4H), 3.90 (d,  $J = 9.2$  Hz, 1H), 3.73-3.61 (m, 2H), 3.10-3.03 (m, 1H), 2.88 (dt,  $J = 16.4, 5.1$  Hz, 1H), 1.16 (t,  $J = 7.2$  Hz, 3H), 1.08 (t,  $J = 7.1$  Hz, 3H).  $^{13}\text{C}\{^1\text{H}\}$  NMR (126 MHz,  $\text{CDCl}_3$ , 25 °C,  $\delta$ ): 168.1, 167.3, 149.0, 136.1, 134.9, 129.2, 129.0, 127.6, 127.3, 126.1, 118.6, 115.2, 61.7, 59.7, 58.0, 42.4, 26.2, 14.04, 13.99.

Spectroscopic data of 1-(nitromethyl)-2-phenyl-1,2,3,4-tetrahydroisoquinoline (**5a**):<sup>S9</sup> The yield was determined to be 85% by  $^1\text{H}$  NMR measurement of the reaction mixture. Column chromatography ( $\text{SiO}_2$ , hexane/ethyl acetate=15/1, v/v) afforded the desired product (58.6 mg, 73%) as a yellow solid.  $^1\text{H}$  NMR (500 MHz,  $\text{CDCl}_3$ , 25 °C,  $\delta$ ): 7.28-7.16 (m,

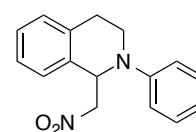

5H), 7.11 (d,  $J = 7.4$  Hz, 1H), 6.97 (d,  $J = 8.2$  Hz, 2H), 6.84 (t,  $J = 7.3$  Hz, 1H), 5.54 (t,  $J = 7.2$  Hz, 1H), 4.85 (dd,  $J = 11.8, 7.9$  Hz, 1H), 4.54 (dd,  $J = 11.8, 6.6$  Hz, 1H), 3.67-3.57 (m, 2H), 3.10-3.04 (m, 1H), 2.77 (dt,  $J = 16.3, 4.9$  Hz, 1H).  $^{13}\text{C}\{^1\text{H}\}$  NMR (126 MHz,  $\text{CDCl}_3$ , 25 °C,  $\delta$ ): 148.5, 135.4, 133.0, 129.6, 129.3, 128.2, 127.1, 126.8, 119.5, 115.2, 78.9, 58.3, 42.1, 26.5.

Spectroscopic data of 2-(3-chlorophenyl)-1-(nitromethyl)-1,2,3,4-tetrahydroisoquinoline (**5c**):<sup>S14</sup> The yield was determined to be 69% by  $^1\text{H}$  NMR measurement of the reaction mixture. Column

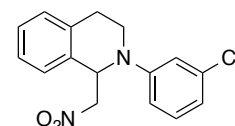

chromatography ( $\text{SiO}_2$ , hexane/diethyl ether=30/1 to 5/1, v/v) afforded the desired product (57.3 mg, 64%) as a yellow oil.  $^1\text{H}$  NMR (500 MHz,  $\text{CDCl}_3$ , 25 °C,  $\delta$ ): 7.27-7.12 (m, 5H), 6.92 (t,  $J = 2.2$  Hz, 1H), 6.85 (dd,  $J = 8.4, 2.5$  Hz, 1H), 6.79 (dd,  $J = 8.0, 1.8$  Hz, 1H), 5.51 (t,  $J = 7.3$  Hz, 1H), 4.84 (dd,  $J = 12.0, 8.0$  Hz, 1H), 4.56 (dd,  $J = 12.1, 6.7$  Hz, 1H), 3.66-3.57 (m, 2H), 3.11-3.05 (m, 1H), 2.80 (dt,  $J = 16.4, 5.1$  Hz, 1H).  $^{13}\text{C}\{^1\text{H}\}$  NMR (126 MHz,  $\text{CDCl}_3$ , 25 °C,  $\delta$ ): 149.6, 135.4, 135.1, 132.5, 130.6, 129.3, 128.4, 127.1, 127.0, 119.3, 114.8, 112.9, 78.7, 58.1, 42.1, 26.4

Spectroscopic data of 1-(nitromethyl)-2-*p*-tolyl-1,2,3,4-tetrahydroisoquinoline (**5f**):<sup>S14</sup> The yield was determined to be 88% by  $^1\text{H}$  NMR measurement of the reaction mixture.

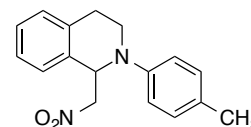

Column chromatography ( $\text{SiO}_2$ , hexane/ethyl acetate=10/1, v/v) afforded the desired product (72.0 mg, 85%) as a white solid.  $^1\text{H}$  NMR (500 MHz,  $\text{CDCl}_3$ , 25 °C,  $\delta$ ): 7.24-7.15 (m, 3H), 7.11 (d,  $J = 7.3$  Hz, 1H), 7.06 (d,  $J = 8.4$  Hz, 2H), 6.87 (dt,  $J = 8.6, 2.5$  Hz, 2H), 5.48 (t,  $J = 7.3$  Hz, 1H), 4.83 (dd,  $J = 11.9, 8.2$  Hz, 1H), 4.53 (dd,  $J = 11.9, 6.3$  Hz, 1H), 3.65-3.53 (m, 2H), 3.07-3.01 (m, 1H), 2.73 (dt,  $J = 16.4, 4.5$  Hz, 1H), 2.25 (s, 3H).  $^{13}\text{C}\{^1\text{H}\}$  NMR (126 MHz,  $\text{CDCl}_3$ , 25 °C,  $\delta$ ): 146.5, 135.5, 133.0, 130.1, 129.4, 129.2, 128.1, 127.1, 126.7, 116.0, 78.9, 58.5, 42.4, 26.3, 20.5.

Spectroscopic data of 2-(2-methoxyphenyl)-1-(nitromethyl)-1,2,3,4-tetrahydroisoquinoline (**5h**):<sup>S9</sup> The yield was determined to be 71% by  $^1\text{H}$  NMR measurement of the reaction mixture.

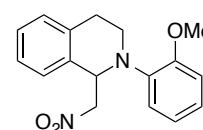

Column chromatography ( $\text{SiO}_2$ , hexane/ethyl acetate=10/1, v/v) afforded the desired product (56.5 mg, 63%) as a white solid.  $^1\text{H}$  NMR (500 MHz,  $\text{CDCl}_3$ , 25 °C,  $\delta$ ): 7.25-



7.20 (m, 2H), 7.16-7.14 (m, 2H), 7.02 (td,  $J = 7.7, 1.8$  Hz, 1H), 6.89-6.82 (m, 3H), 5.50 (dd,  $J = 8.3, 5.0$  Hz, 1H), 4.82 (dd,  $J = 12.0, 8.4$  Hz, 1H), 4.53 (dd,  $J = 12.1, 5.0$  Hz, 1H), 3.62-3.58 (m, 1H), 3.51-3.45 (m, 1H), 3.02-2.95 (m, 1H), 2.71 (ddd,  $J = 16.5, 4.0, 2.3$  Hz, 1H).  $^{13}\text{C}\{^1\text{H}\}$  NMR (126 MHz,  $\text{CDCl}_3$ , 25 °C,  $\delta$ ): 153.2, 139.0, 135.5, 133.8, 129.7, 127.7, 127.0, 126.6, 124.2, 122.1, 121.1, 112.6, 79.3, 58.3, 55.9, 43.1, 27.0

Spectroscopic data of triethyl 5,6-dihydropyrro[1,2-*a*]isoquinoline-1,2,3-tricarboxylate (**9a**):<sup>S15</sup> Column chromatography ( $\text{SiO}_2$ , hexane/ $\text{CH}_2\text{Cl}_2 = 1:1$  to 2:8, v/v) afforded the desired product (60.7 mg, 52%) as an orange solid.  $^1\text{H}$  NMR (500 MHz,  $\text{CDCl}_3$ , 25 °C,  $\delta$ ): 8.20-8.16 (m, 1H), 7.34-7.29 (m, 2H), 7.26-7.24 (m, 1H), 4.54 (t, 2H), 4.38 (q,  $J = 7.2$  Hz, 2H), 4.34-4.29 (m, 4H), 3.00 (t,  $J = 6.5$  Hz, 2H), 1.41 (t,  $J = 7.2$  Hz, 3H), 1.36-1.32 (m, 6H).  $^{13}\text{C}\{^1\text{H}\}$  NMR (126 MHz,  $\text{CDCl}_3$ , 25 °C,  $\delta$ ): 166.2, 163.5, 160.0, 136.8, 134.4, 129.3, 128.6, 127.4, 127.0, 126.5, 119.1, 110.8, 61.6, 61.1, 60.8, 42.6, 29.4, 14.21, 14.17, 14.1.

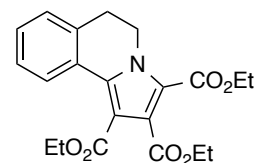

Spectroscopic data of ethyl 9,14-dioxo-5,6,9,14-tetrahydrobenzo[5,6]isoindolo[1,2-*a*]isoquinoline-8-carboxylate (**9b**):<sup>S15</sup> Column chromatography ( $\text{SiO}_2$ , hexane/ethyl acetate/triethylamine = 99/1/0.2, v/v) afforded the desired product (61.9 mg, 56%) as an orange solid.  $^1\text{H}$  NMR (500 MHz,  $\text{CDCl}_3$ , 25 °C,  $\delta$ ): 8.99 (dd,  $J = 8.0, 0.8$  Hz, 1H), 8.31-8.27 (m, 1H), 8.23-8.19 (m, 1H), 7.74-7.68 (m, 2H), 7.45 (td,  $J = 7.6, 1.1$  Hz, 1H), 7.37 (td,  $J = 7.4, 1.3$  Hz, 1H), 7.27 (d,  $J = 7.0$  Hz, 1H, overlapped with  $\text{CHCl}_3$ ), 4.55 (q,  $J = 7.2$  Hz, 2H), 4.29 (t,  $J = 6.6$  Hz, 2H), 3.10 (t,  $J = 6.6$  Hz, 2H), 1.50 (t,  $J = 7.1$  Hz, 3H).  $^{13}\text{C}\{^1\text{H}\}$  NMR (126 MHz,  $\text{CDCl}_3$ , 25 °C,  $\delta$ ): 179.9, 179.6, 161.6, 135.8, 134.8, 133.8, 133.4, 133.1, 130.2, 129.0, 127.6, 127.3, 126.7, 126.5, 126.2, 123.3, 117.6, 62.6, 43.3, 29.2, 14.1.

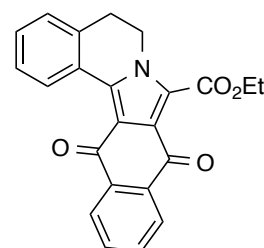

**ESI-MS Analysis of 14a.** The reaction intermediate **14a** was confirmed by ESI-TOF-MS measurement of the reaction mixture obtained after stirring for 12 h under the standard condition (Scheme 3C, Figure S1).

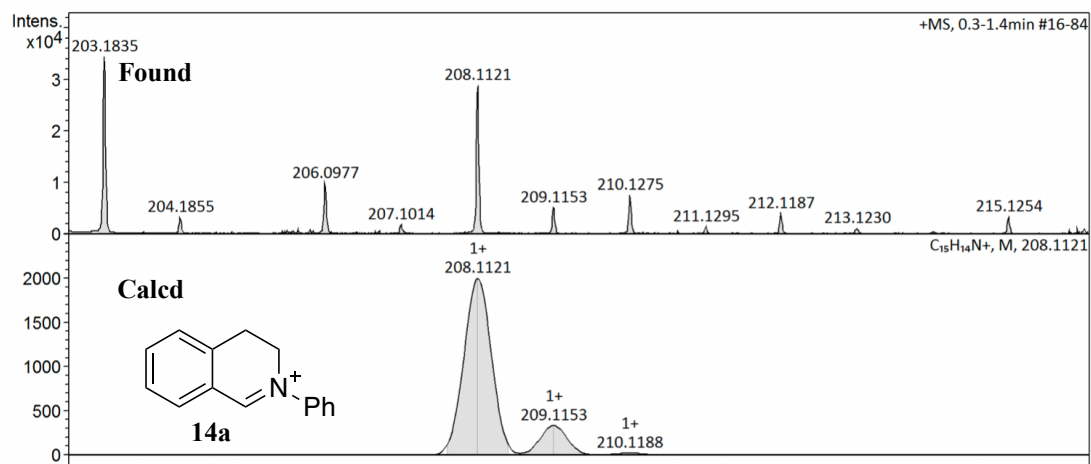

**Figure S1.** ESI-TOF mass spectrum of the reaction mixture.

#### 4. $^1\text{H}$ and $^{13}\text{C}\{^1\text{H}\}$ NMR Spectra of Novel Compounds

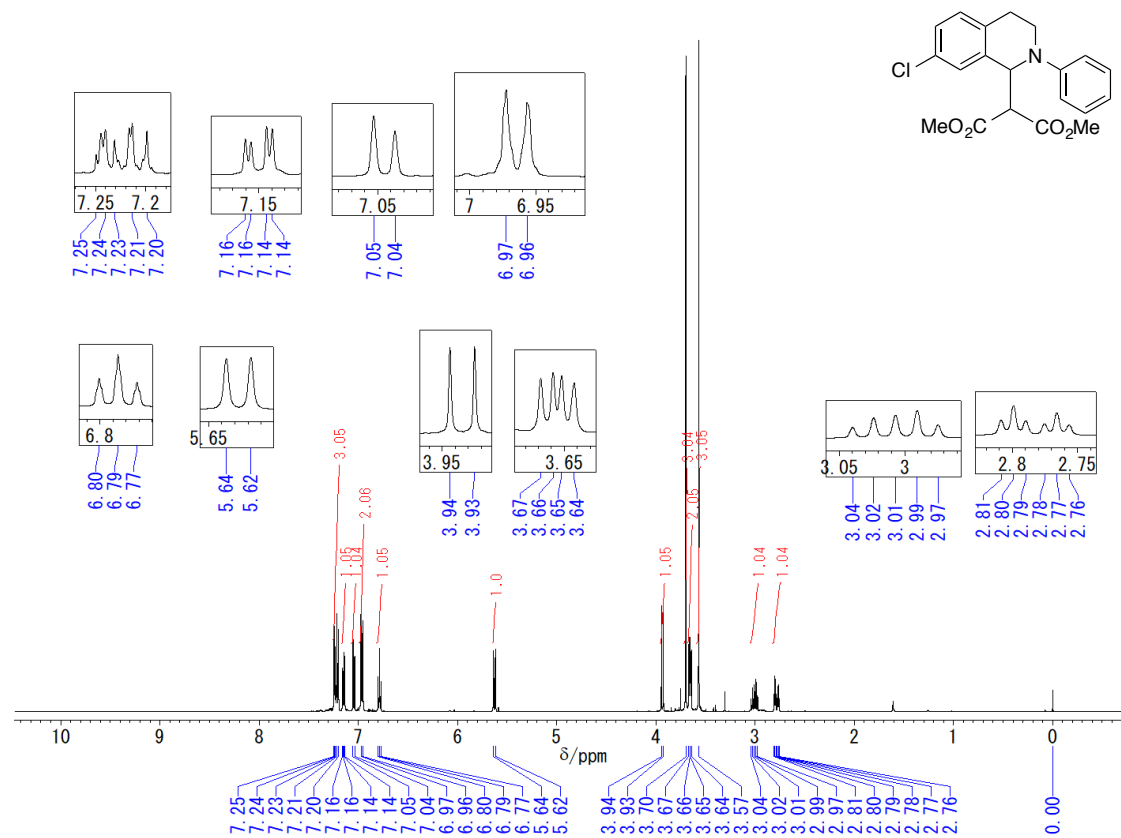

**Spectrum S1.**  $^1\text{H}$  NMR (CDCl<sub>3</sub>, 500 MHz) spectrum of compound **4d**.

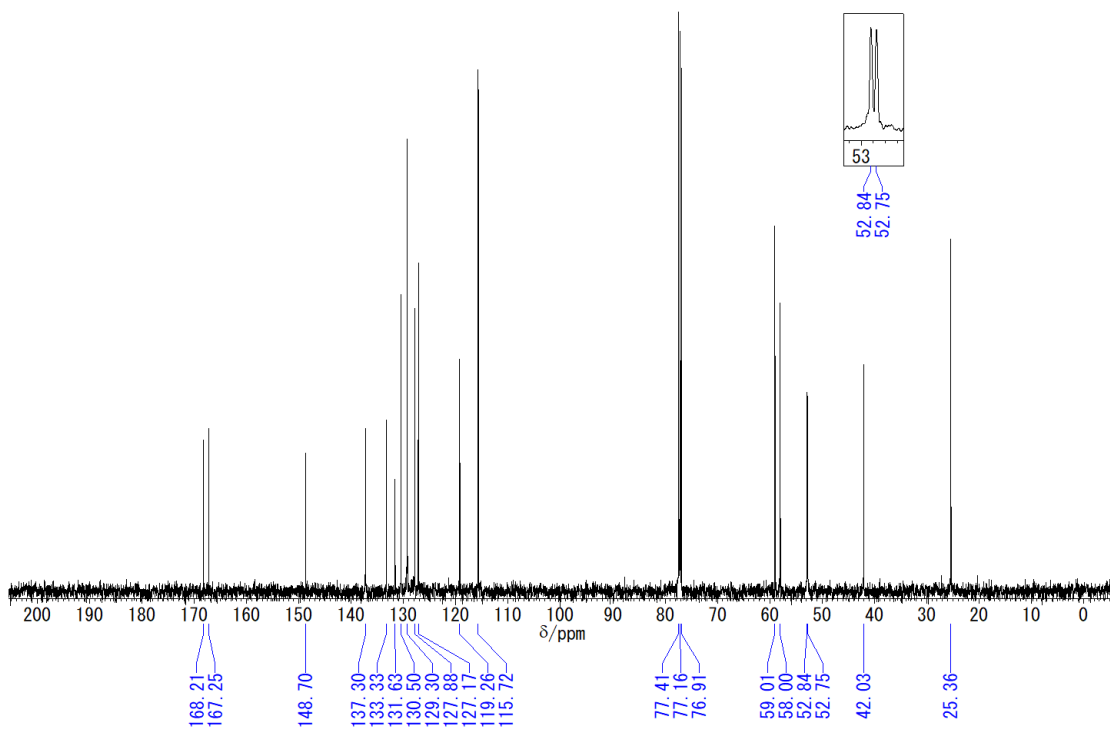

**Spectrum S2.**  $^{13}\text{C}\{^1\text{H}\}$  NMR (CDCl<sub>3</sub>, 126 MHz) spectrum of compound **4d**.

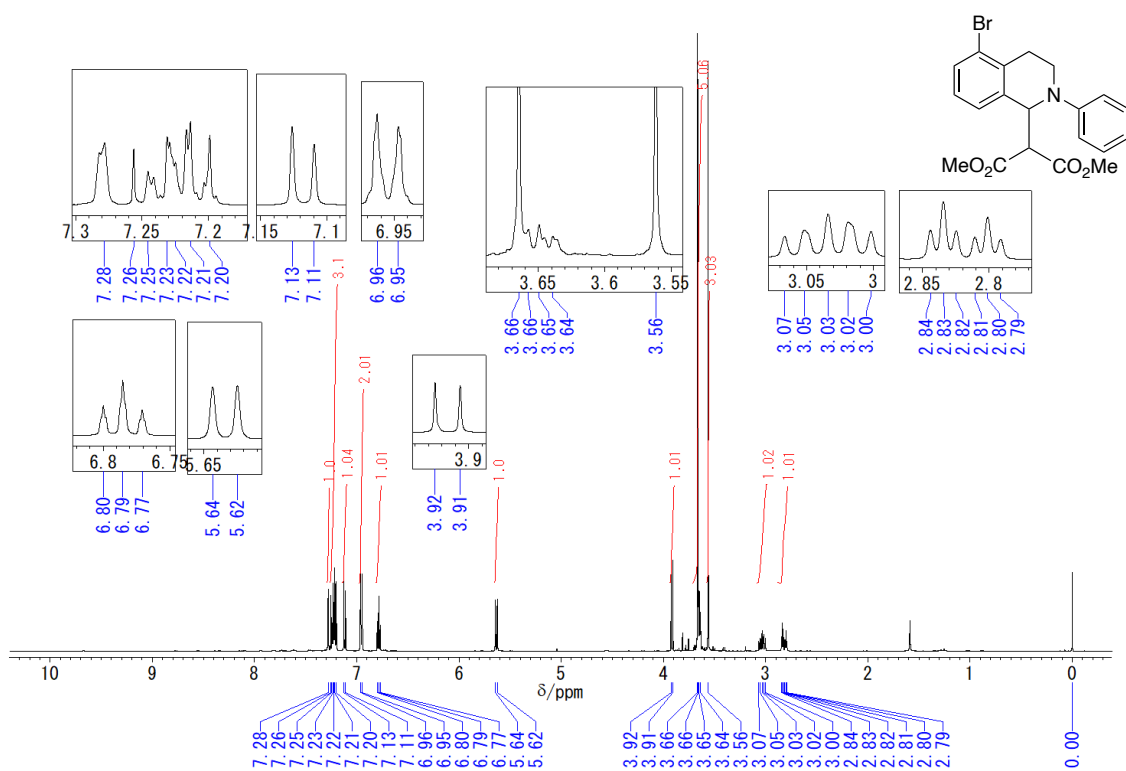

**Spectrum S3.** <sup>1</sup>H NMR (CDCl<sub>3</sub>, 500 MHz) spectrum of compound 4e.

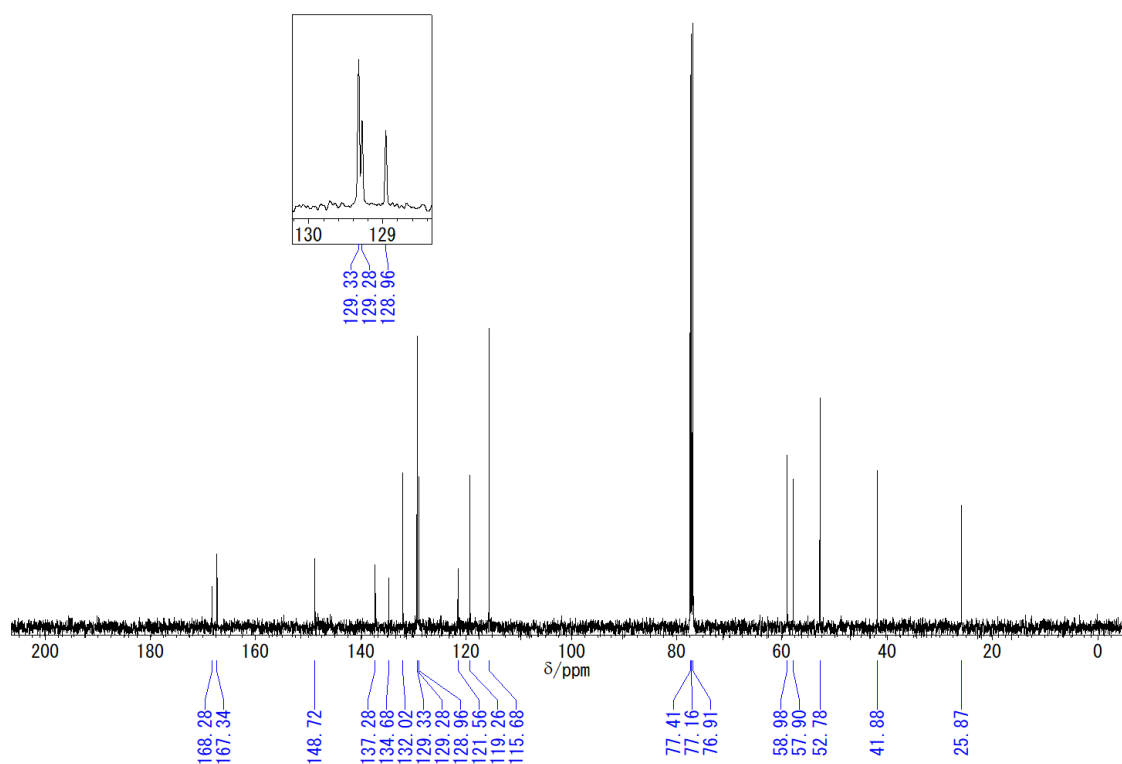

**Spectrum S4.** <sup>13</sup>C {<sup>1</sup>H} NMR (CDCl<sub>3</sub>, 126 MHz) spectrum of compound 4e.

## 5. $^1\text{H}$ and $^{13}\text{C}\{^1\text{H}\}$ NMR Spectra of Known Compounds

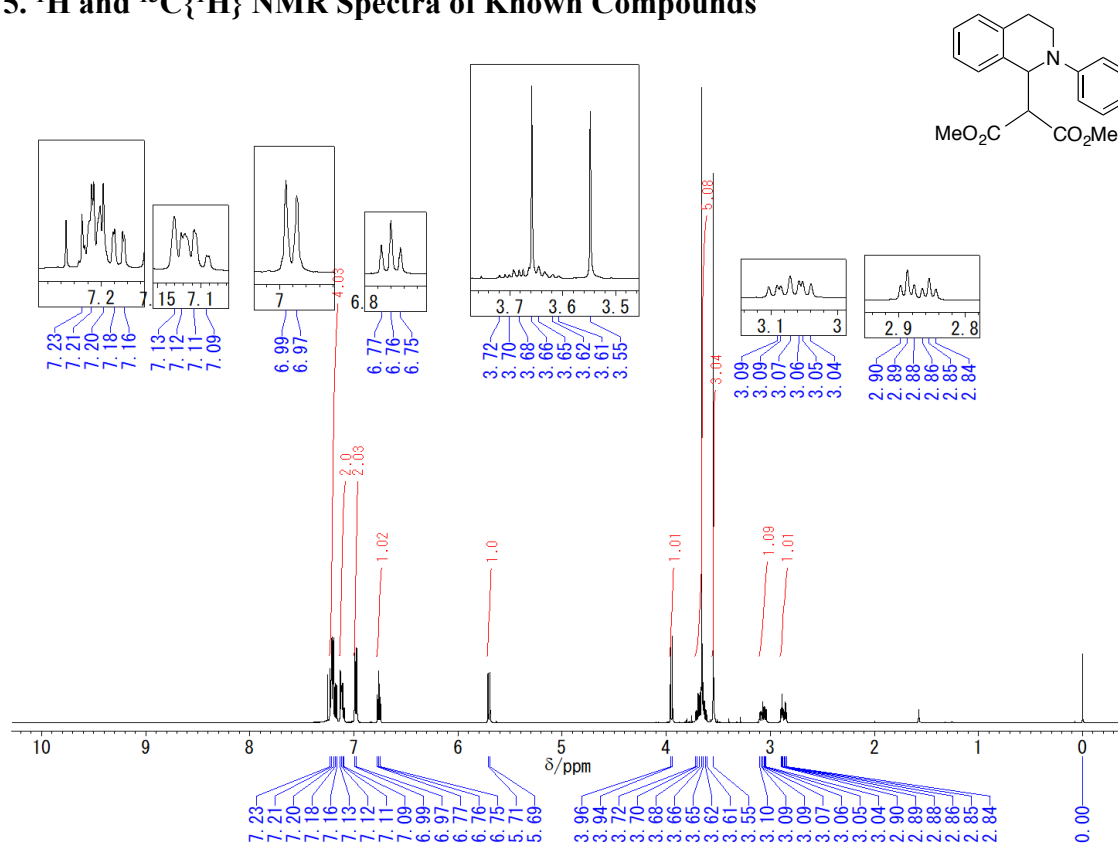

Spectrum S5.  $^1\text{H}$  NMR (CDCl<sub>3</sub>, 500 MHz) spectrum of compound 4a.

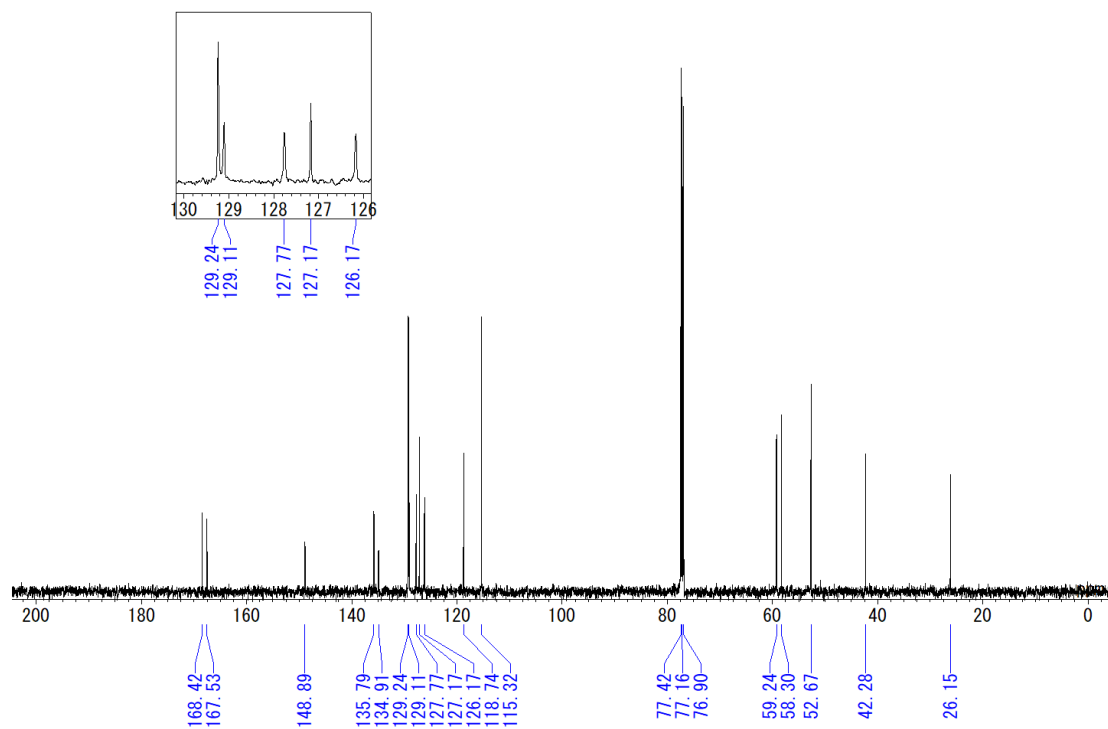

Spectrum S6.  $^{13}\text{C}\{^1\text{H}\}$  NMR (CDCl<sub>3</sub>, 126 MHz) spectrum of compound 4a.

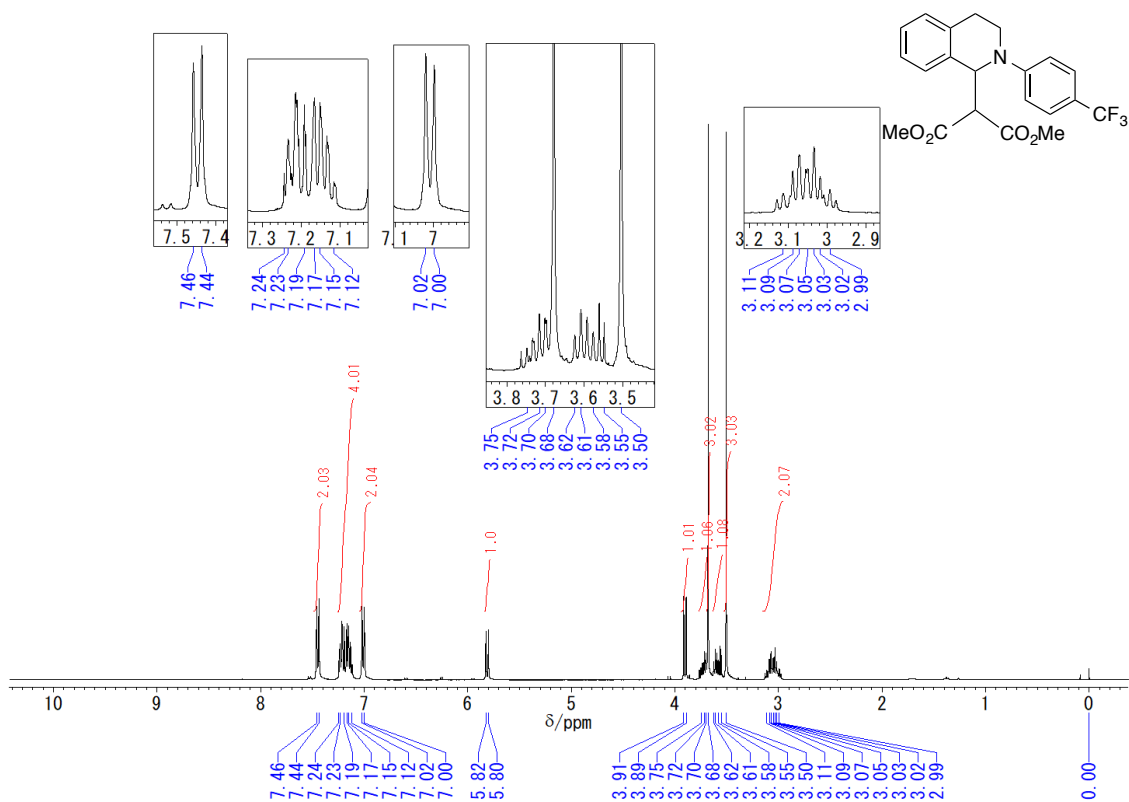

Spectrum S7. <sup>1</sup>H NMR (CDCl<sub>3</sub>, 500 MHz) spectrum of compound 4b.

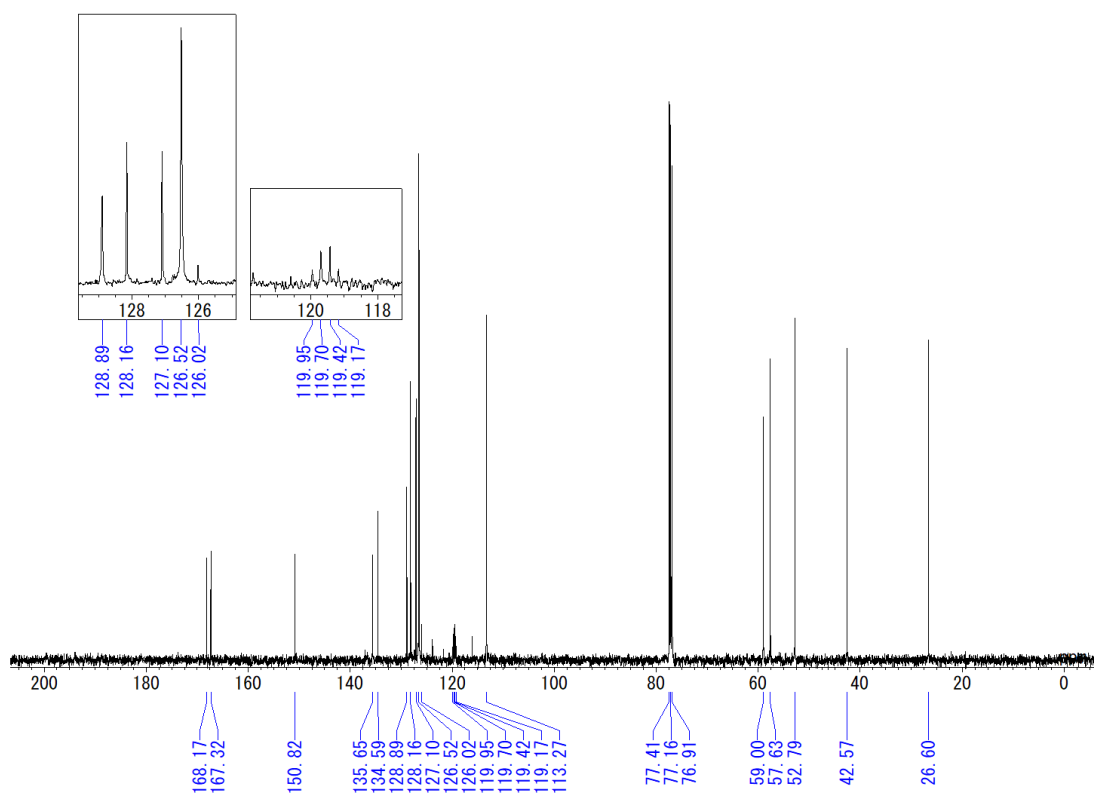

Spectrum S8. <sup>13</sup>C{<sup>1</sup>H} NMR (CDCl<sub>3</sub>, 126 MHz) spectrum of compound 4b.

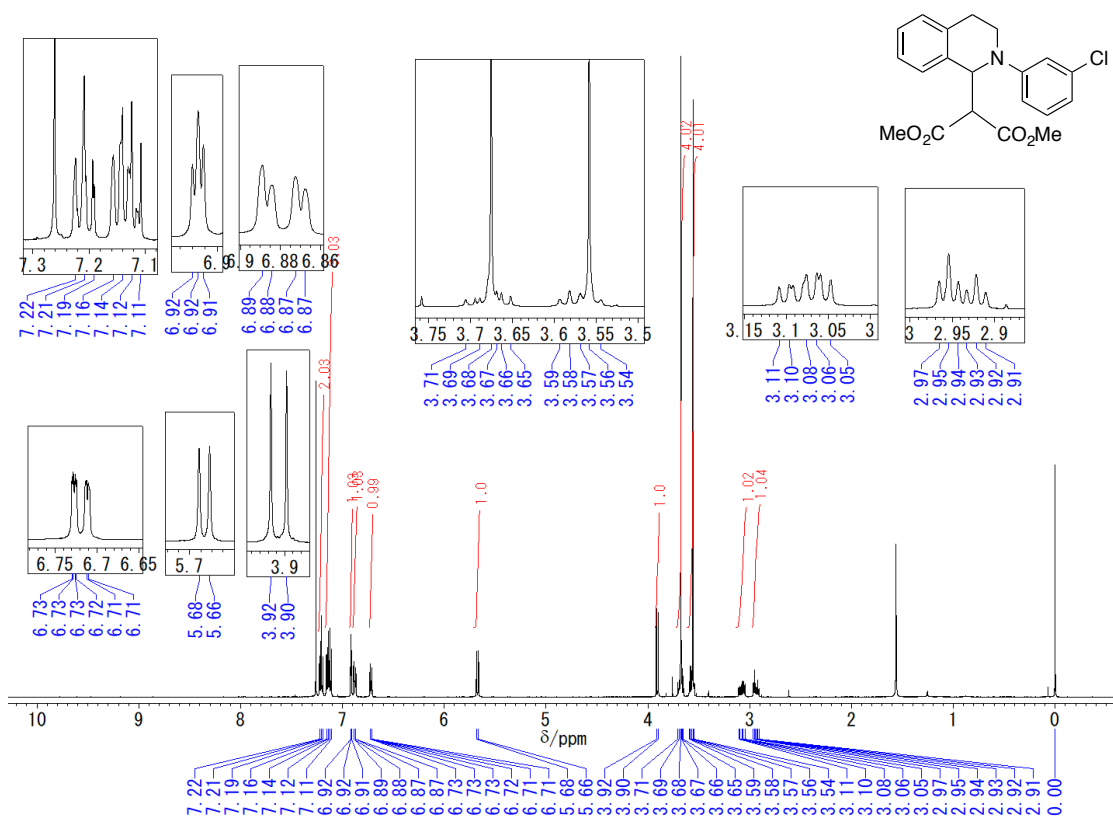

Spectrum S9. <sup>1</sup>H NMR (CDCl<sub>3</sub>, 500 MHz) spectrum of compound 4c.

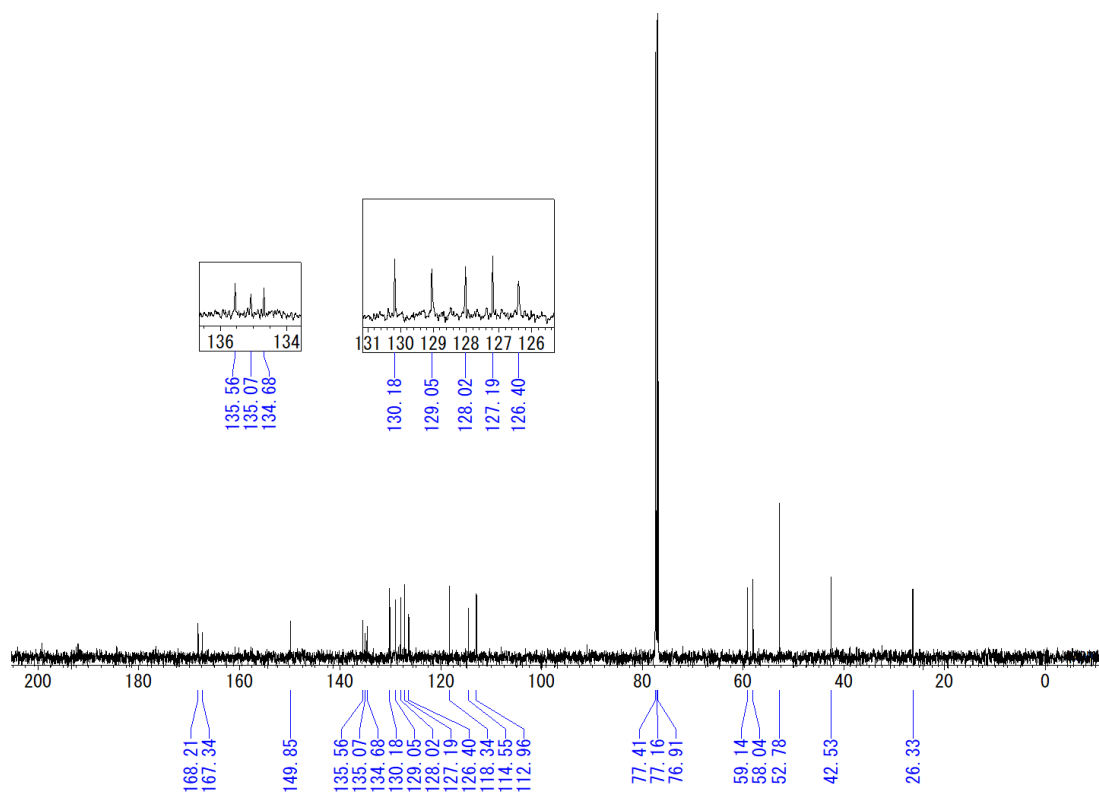

Spectrum S10. <sup>13</sup>C {<sup>1</sup>H} NMR (CDCl<sub>3</sub>, 126 MHz) spectrum of compound 4c.

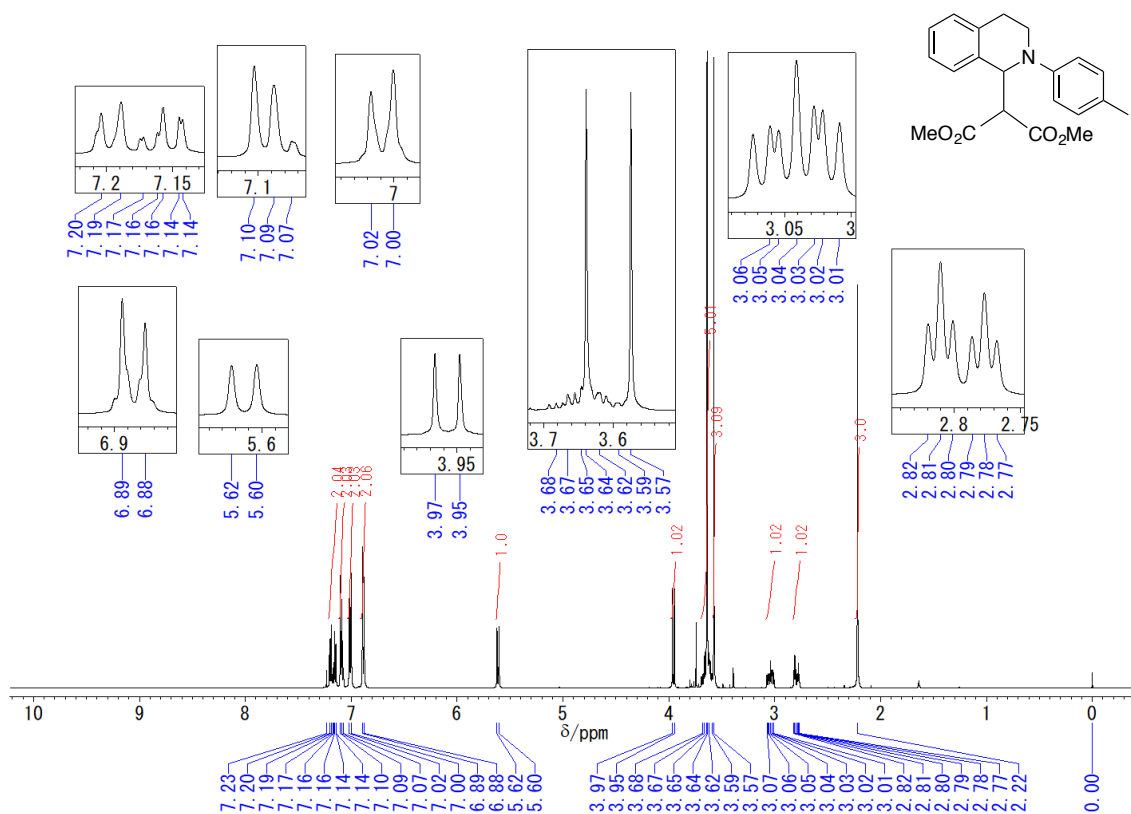

**Spectrum S11.** <sup>1</sup>H NMR (CDCl<sub>3</sub>, 500 MHz) spectrum of compound 4f.

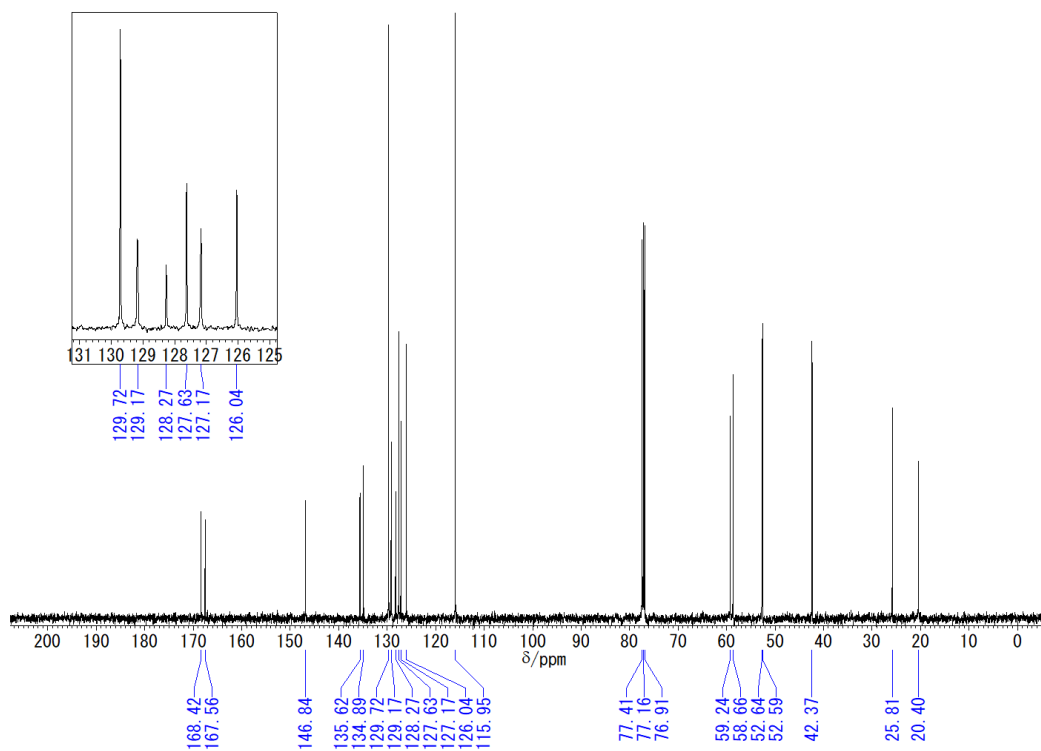

**Spectrum S12.** <sup>13</sup>C {<sup>1</sup>H} NMR (CDCl<sub>3</sub>, 126 MHz) spectrum of compound 4f.



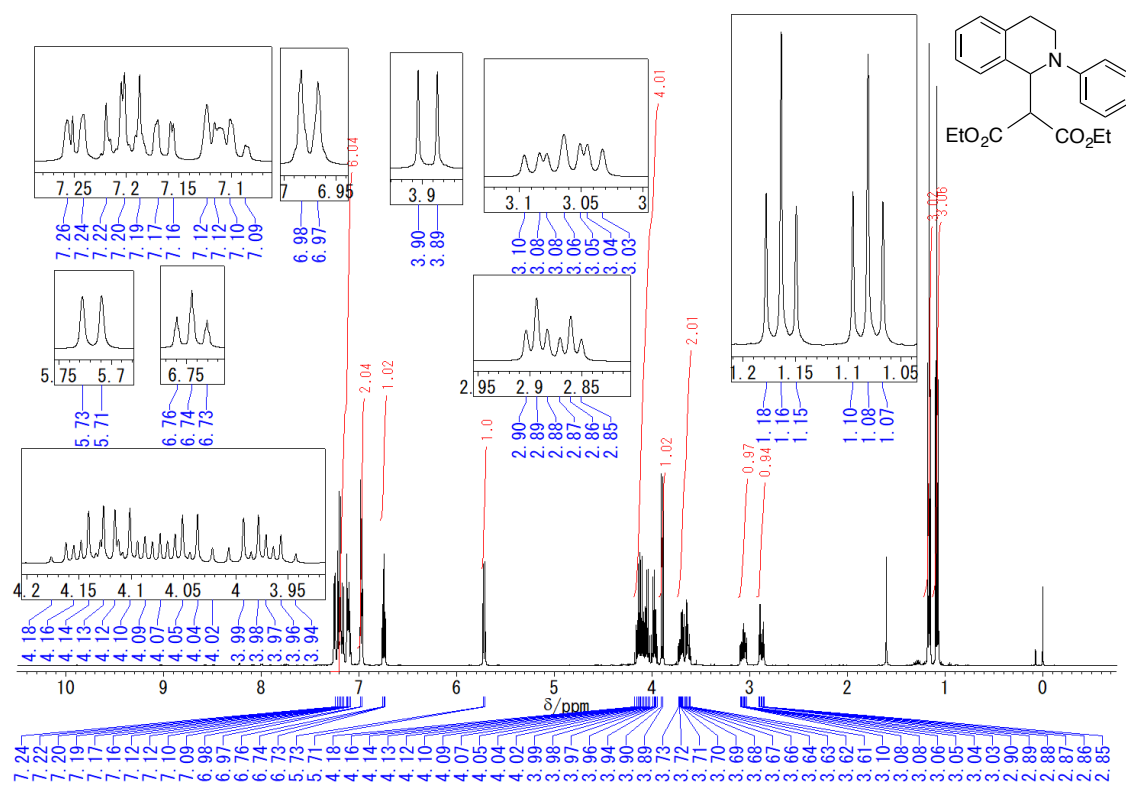

**Spectrum S13.**  $^1\text{H}$  NMR ( $\text{CDCl}_3$ , 500 MHz) spectrum of compound **4g**.

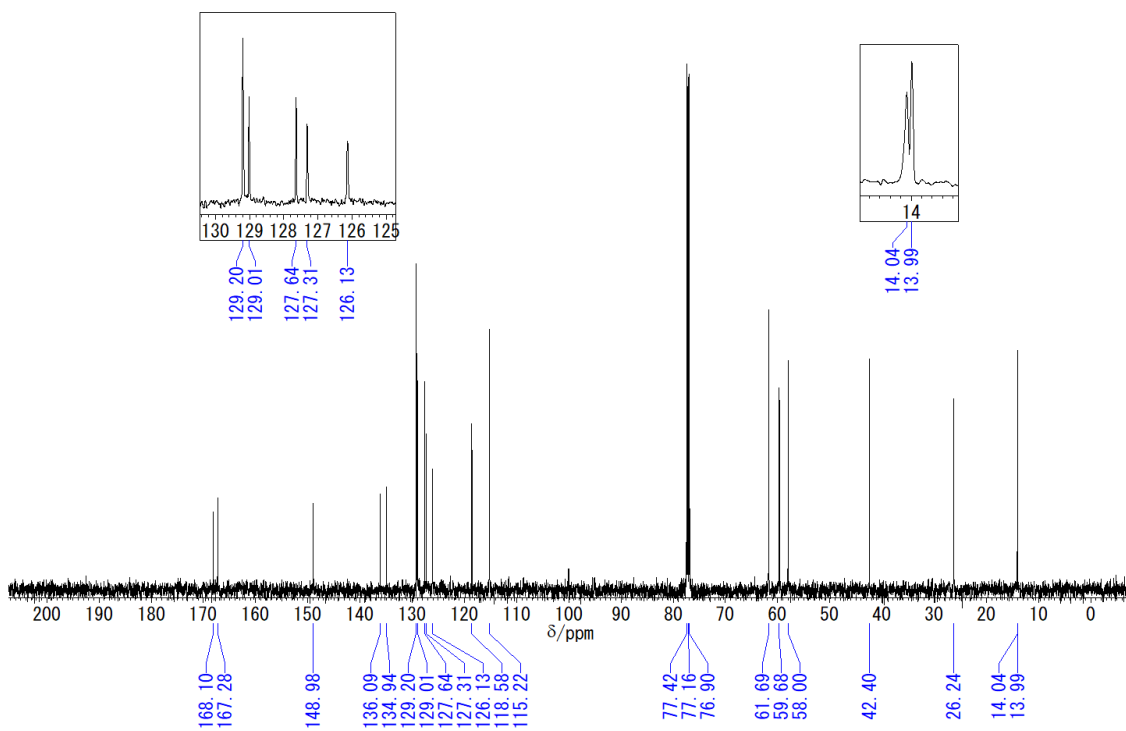

**Spectrum S14.**  $^{13}\text{C}\{^1\text{H}\}$  NMR ( $\text{CDCl}_3$ , 126 MHz) spectrum of compound **4g**.

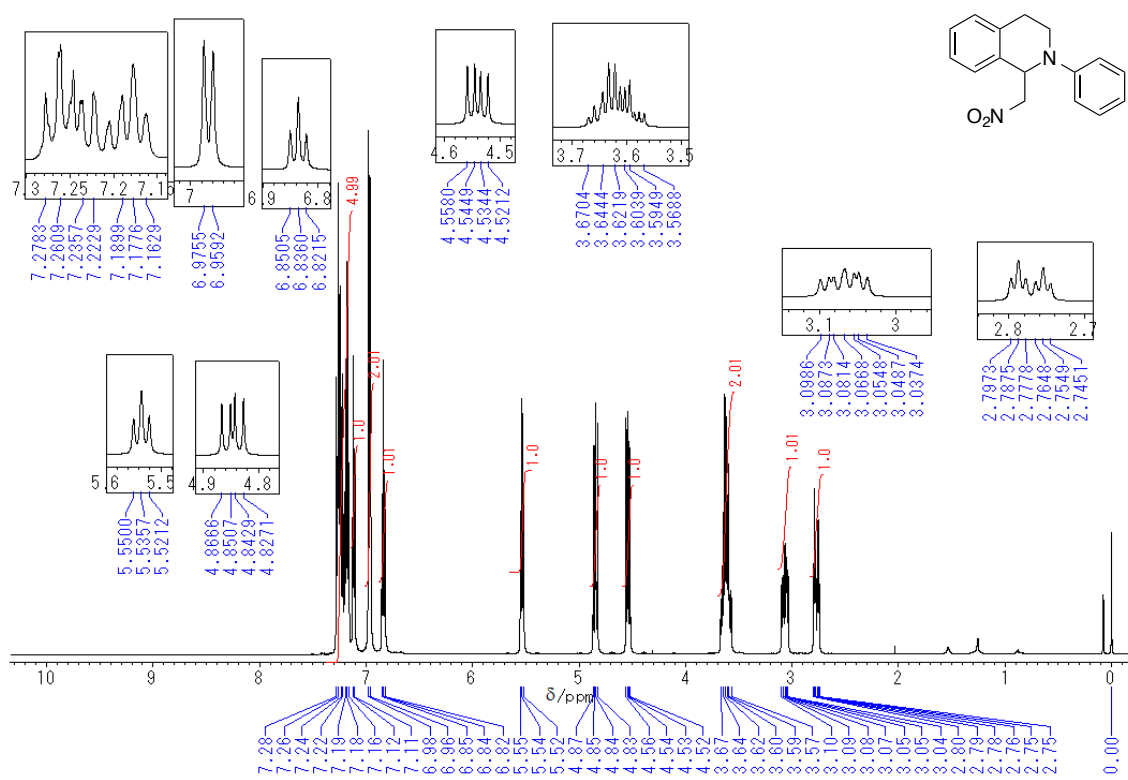

Spectrum S15. <sup>1</sup>H NMR (CDCl<sub>3</sub>, 500 MHz) spectrum of compound 5a.

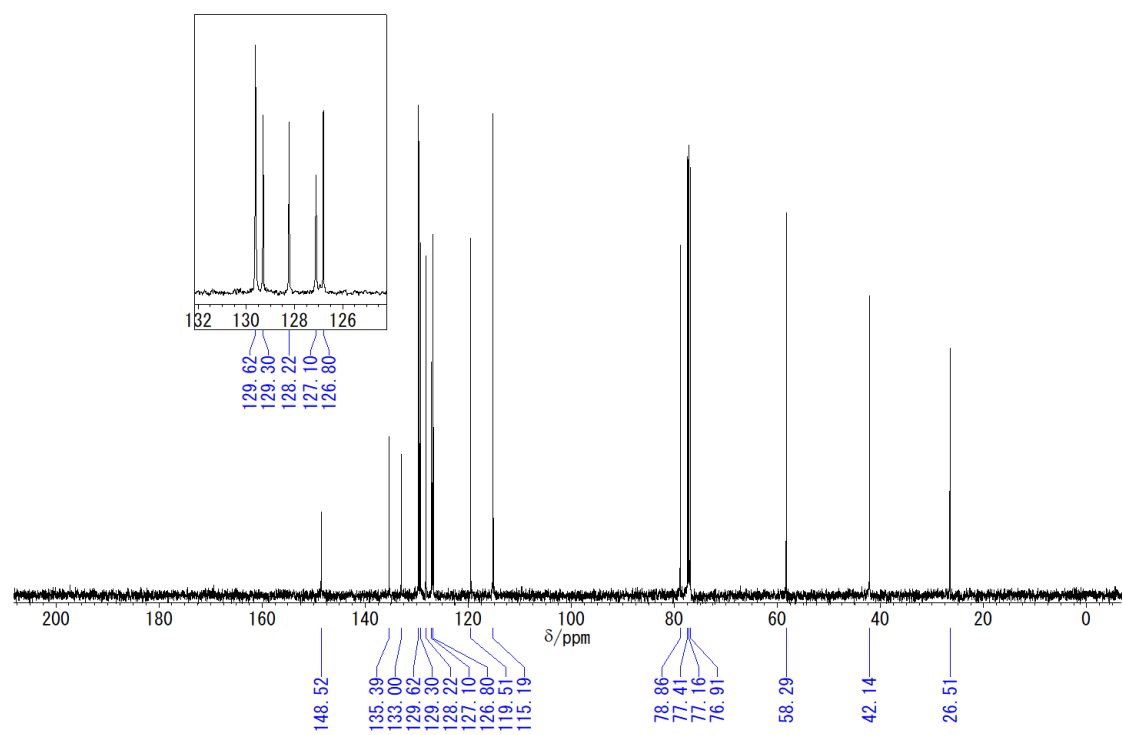

Spectrum S16. <sup>13</sup>C{<sup>1</sup>H} NMR (CDCl<sub>3</sub>, 126 MHz) spectrum of compound 5a.

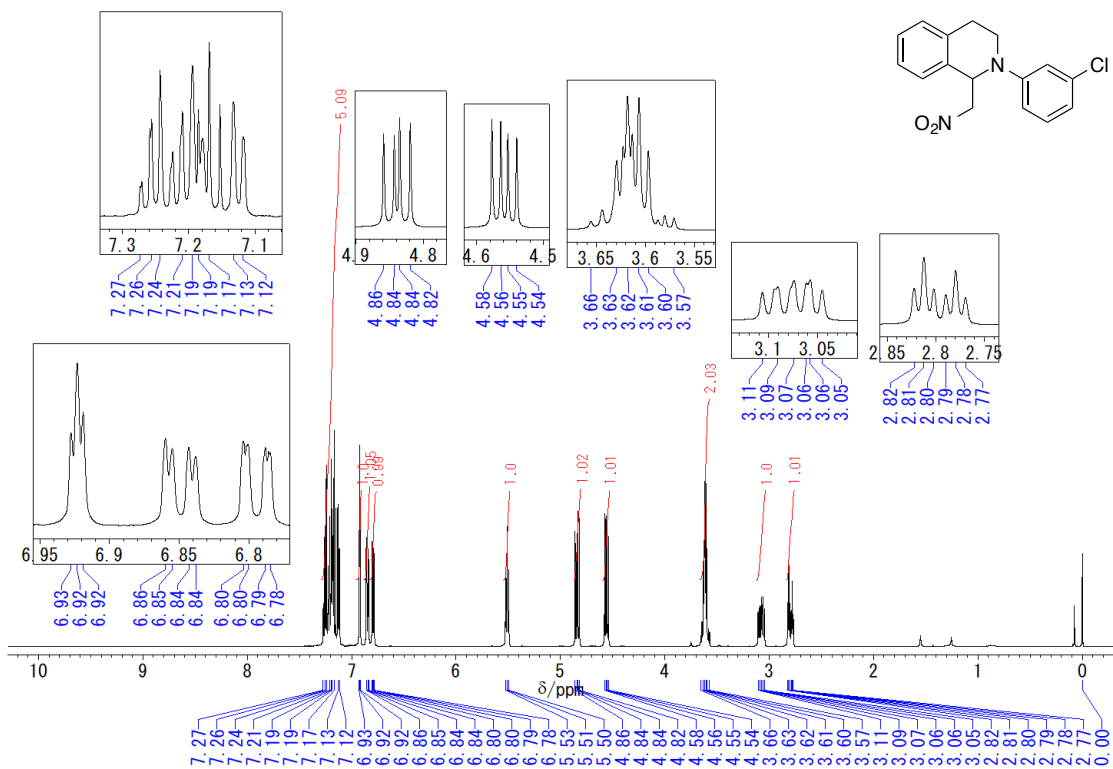

**Spectrum S17.** <sup>1</sup>H NMR (CDCl<sub>3</sub>, 500 MHz) spectrum of compound **5c**.

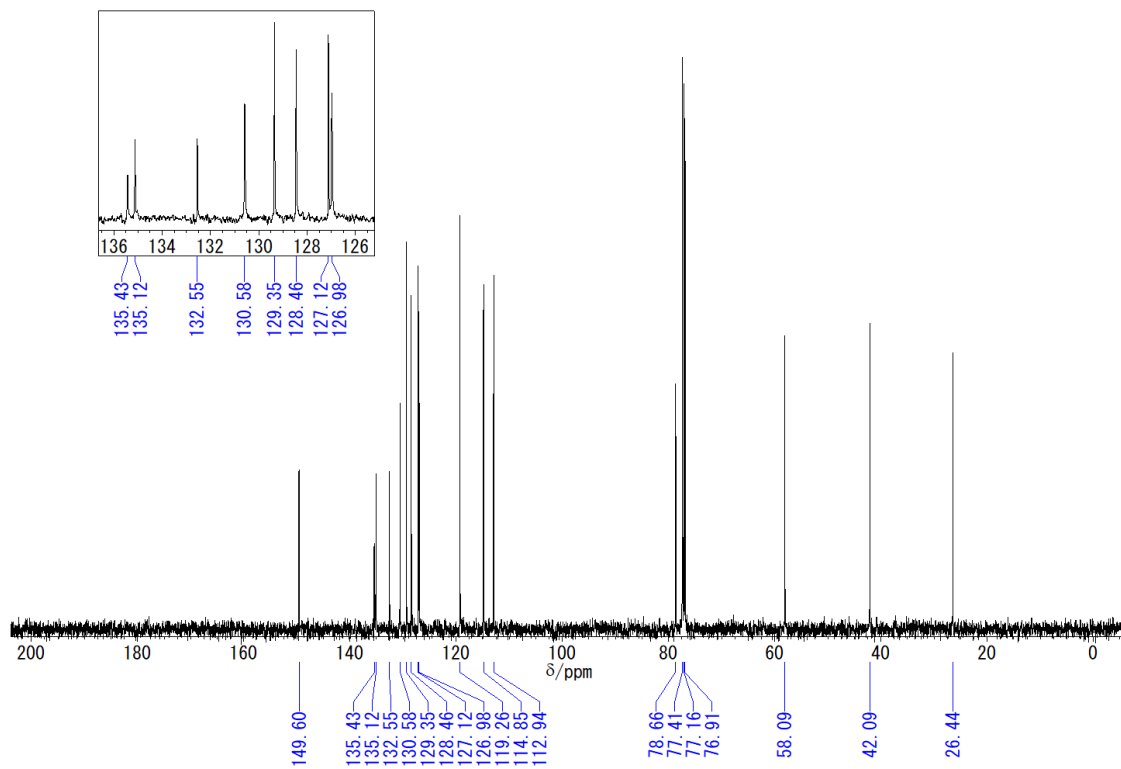

**Spectrum S18.** <sup>13</sup>C{<sup>1</sup>H} NMR (CDCl<sub>3</sub>, 126 MHz) spectrum of compound **5c**.

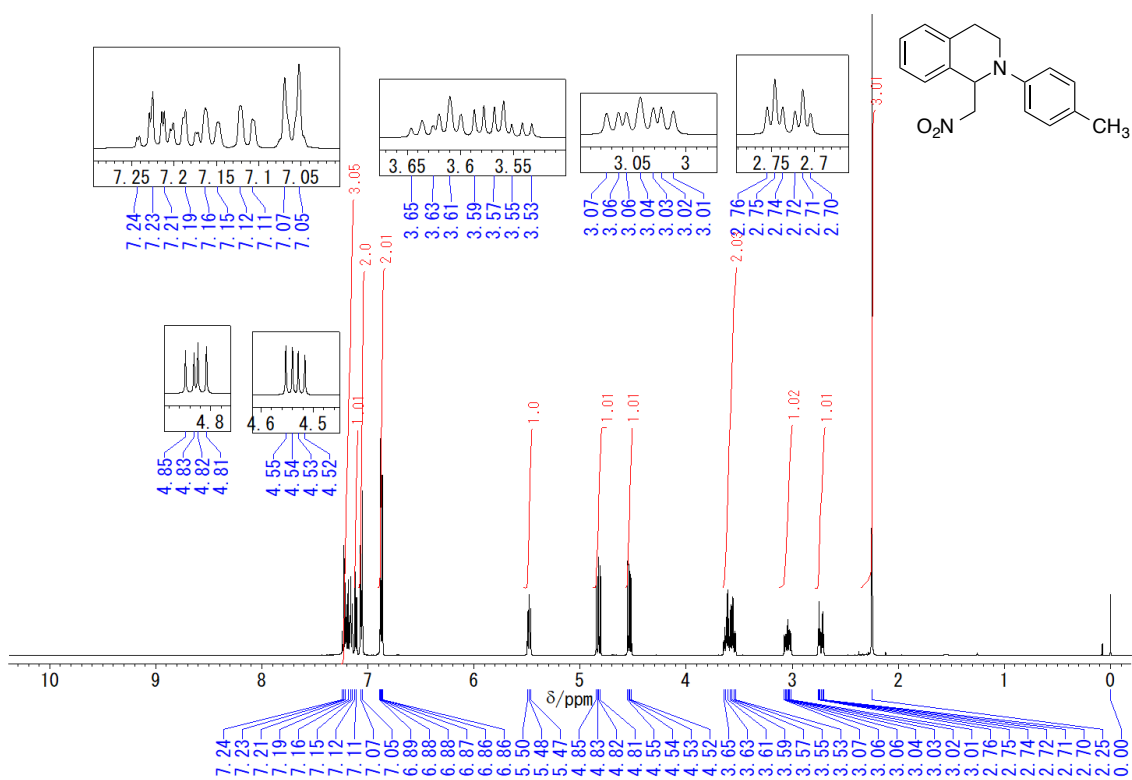

**Spectrum S19.** <sup>1</sup>H NMR (CDCl<sub>3</sub>, 500 MHz) spectrum of compound **5f**.

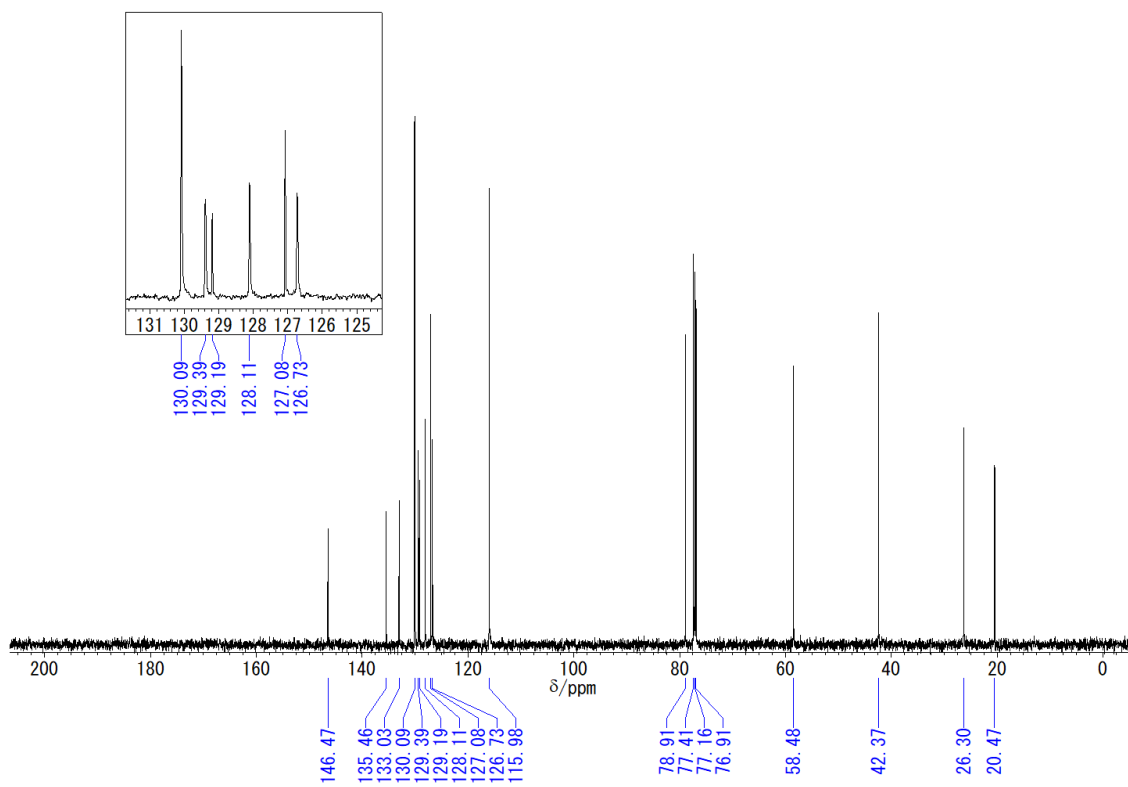

**Spectrum S20.** <sup>13</sup>C{<sup>1</sup>H} NMR (CDCl<sub>3</sub>, 126 MHz) spectrum of compound **5f**.

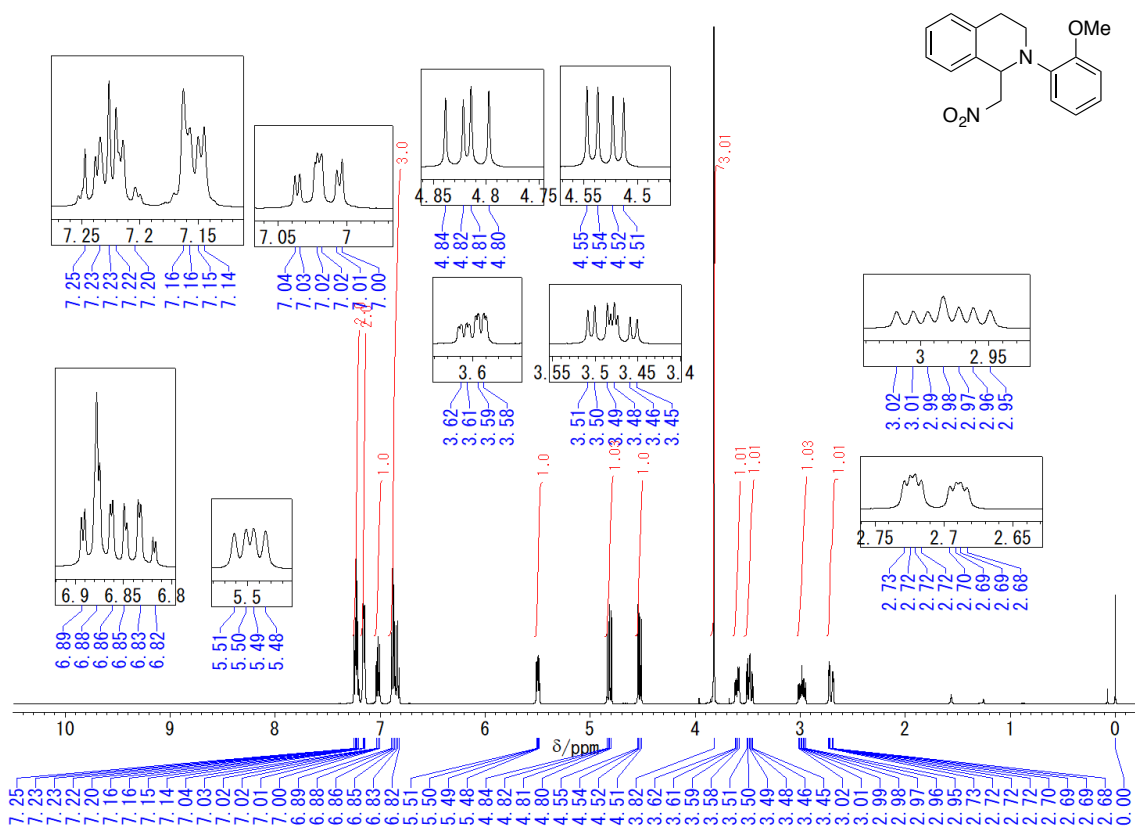

**Spectrum S21.** <sup>1</sup>H NMR (CDCl<sub>3</sub>, 500 MHz) spectrum of compound **5h**.

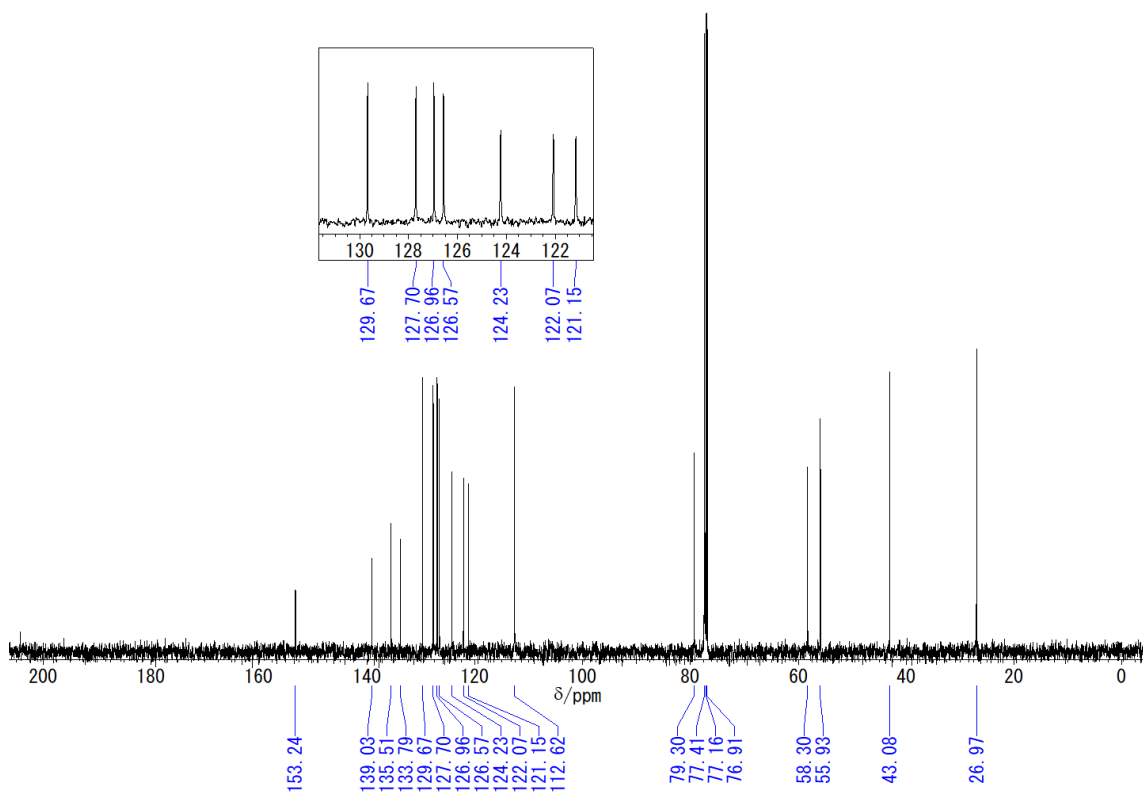

**Spectrum S22.** <sup>13</sup>C {<sup>1</sup>H} NMR (CDCl<sub>3</sub>, 126 MHz) spectrum of compound **5h**.

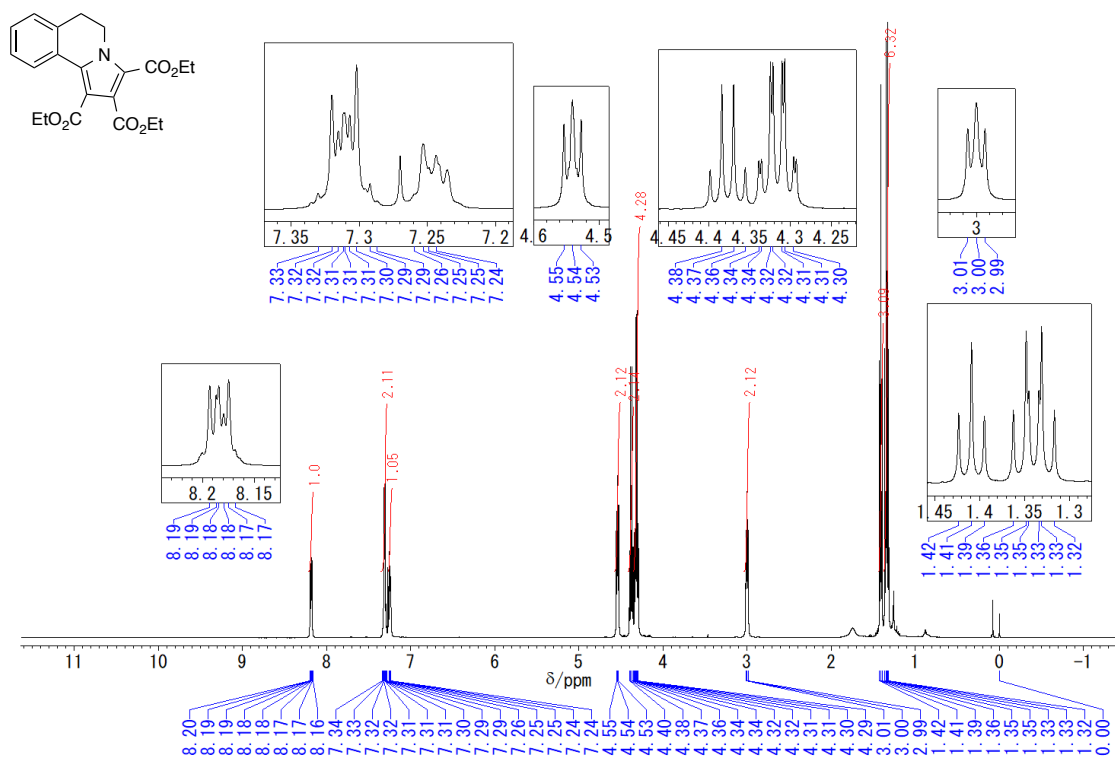

Spectrum S23. <sup>1</sup>H NMR (CDCl<sub>3</sub>, 500 MHz) spectrum of compound **9a**.

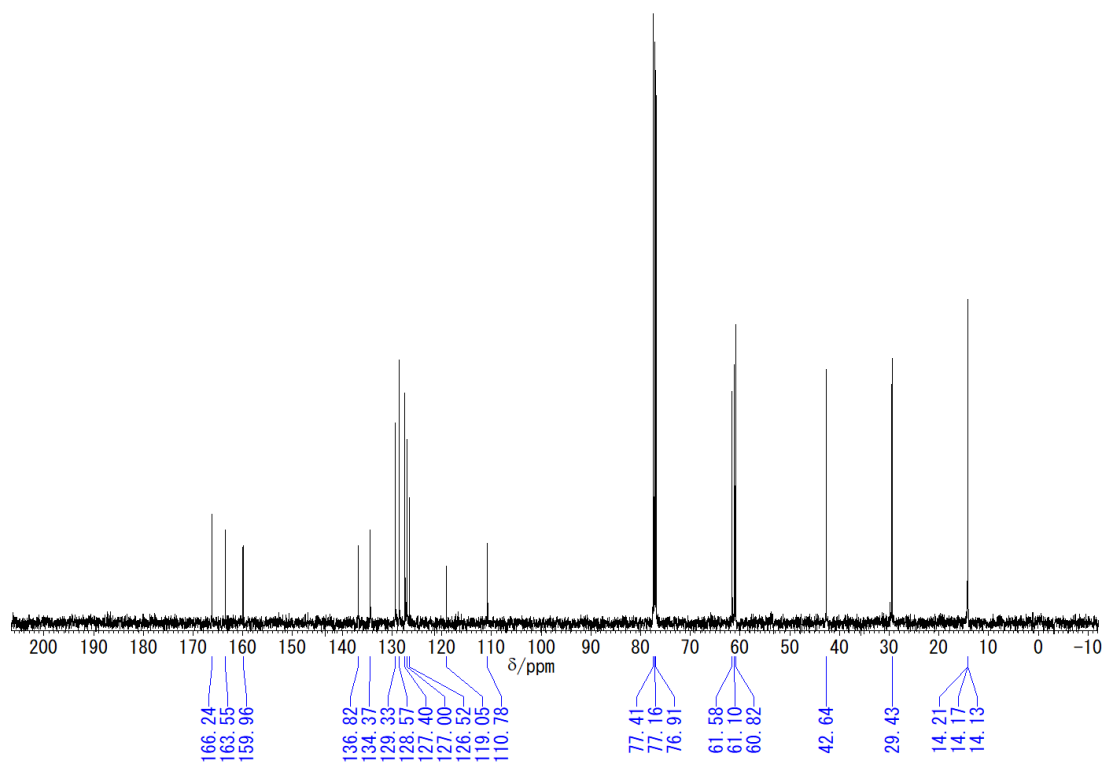

Spectrum S24. <sup>13</sup>C{<sup>1</sup>H} NMR (CDCl<sub>3</sub>, 126 MHz) spectrum of compound **9a**.

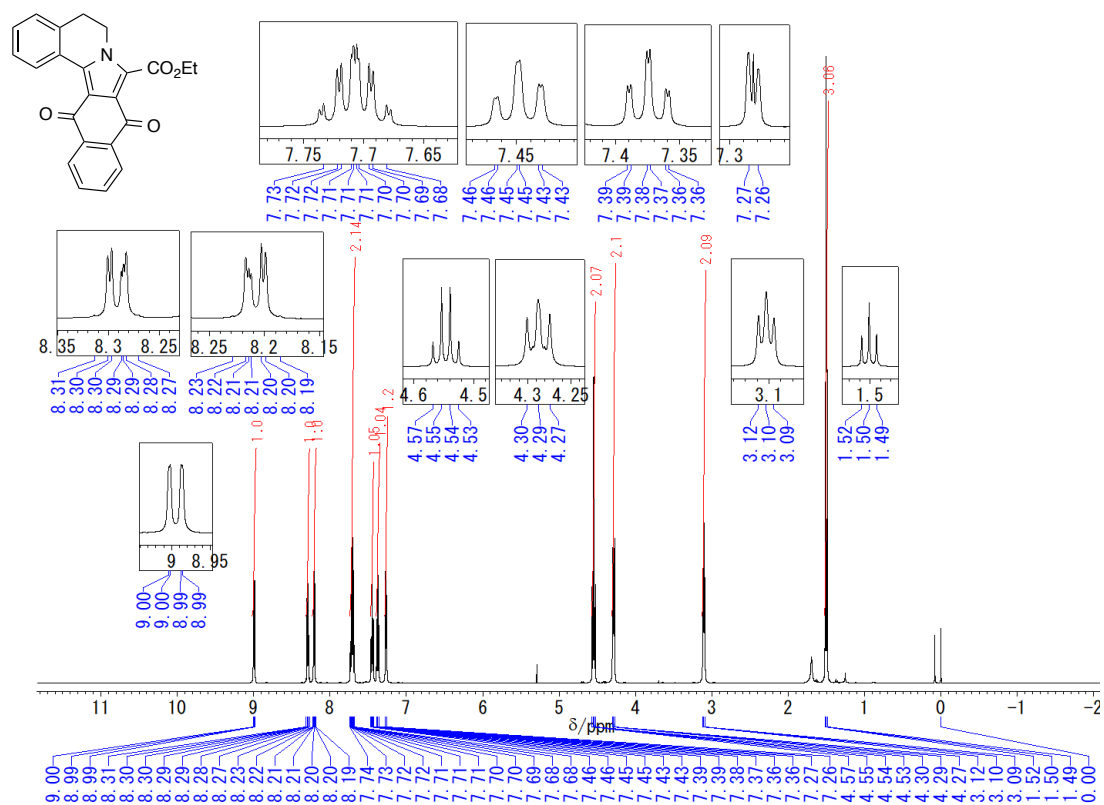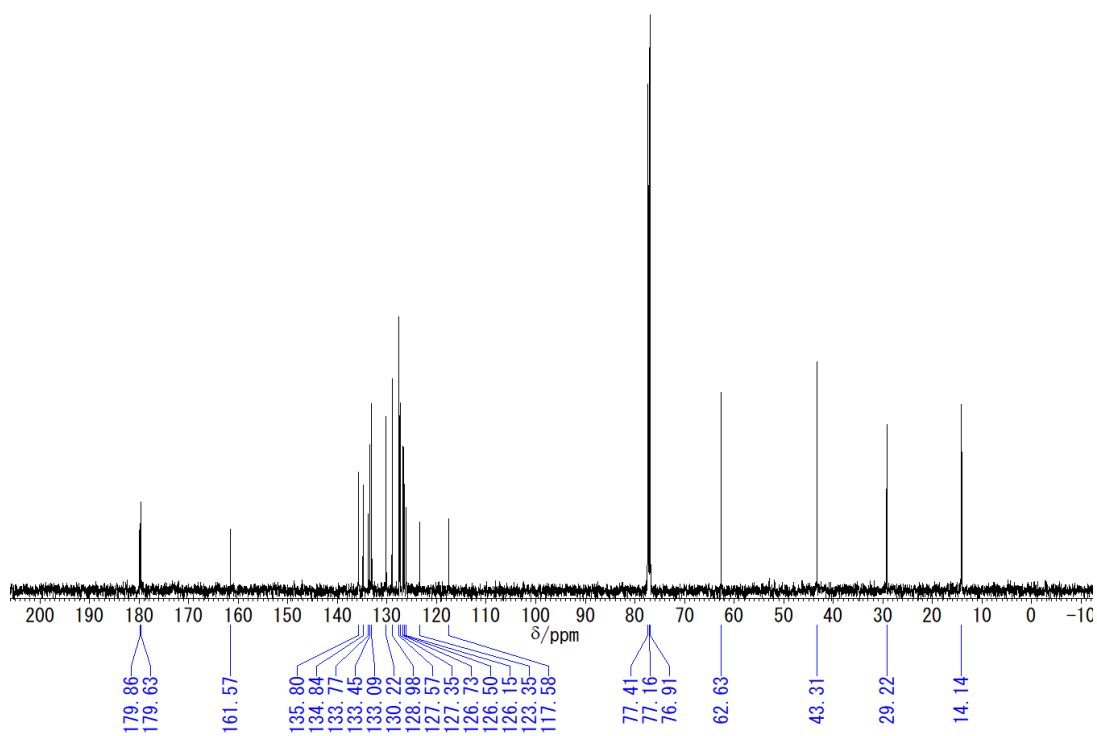

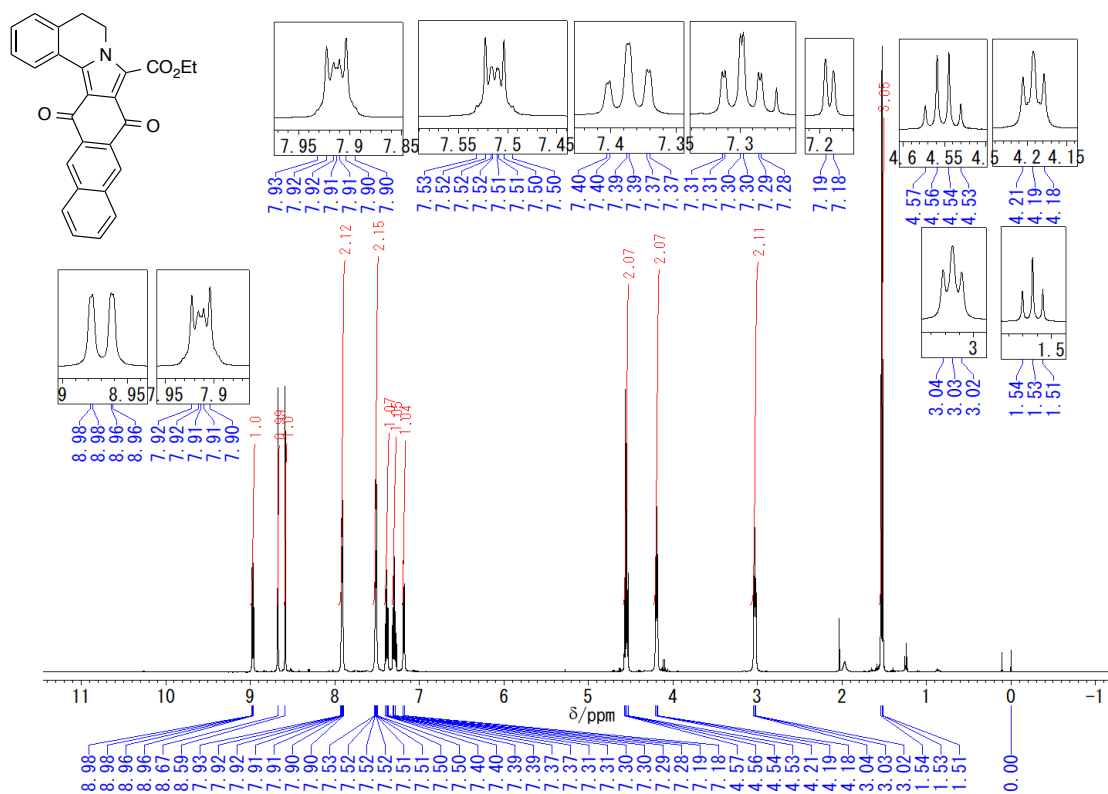

**Spectrum S27.** <sup>1</sup>H NMR (CDCl<sub>3</sub>, 500 MHz) spectrum of compound **9c**.

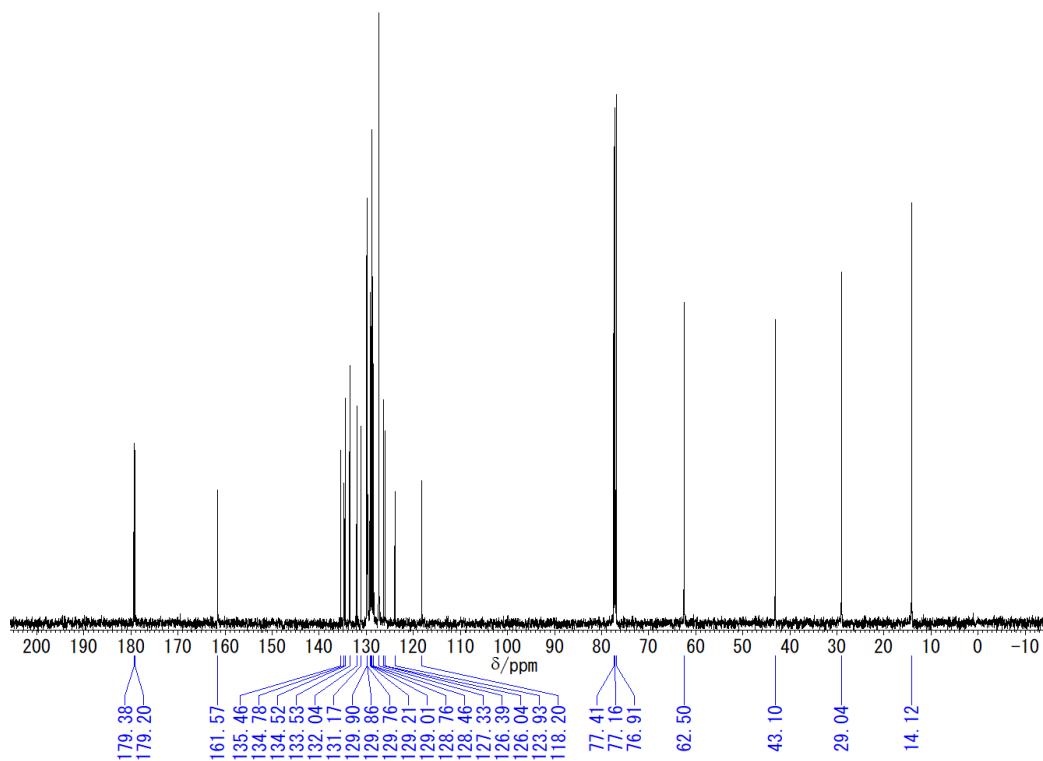

**Spectrum S28.** <sup>13</sup>C{<sup>1</sup>H} NMR (CDCl<sub>3</sub>, 126 MHz) spectrum of compound **9c**.



## 6. References

- (S1) F. Müller, B. M. Donald, D. W. Lemuel, *Methods Enzymol.*, 1971, **18**, 453-458.
- (S2) T. Sakai, T. Kumoi, T. Ishikawa, T. Nitta, H. Iida, *Org. Biomol. Chem.*, 2018, **16**, 3999-4007.
- (S3) A. Pokluda, Z. Anwar, V. Boguschov, I. Anusiewicz, P. Skurski, M. Sikorski, R. Cibulka, *Adv. Synth. Catal.*, 2021, **363**, 4371-4379.
- (S4) T. Ishikawa, M. Kimura, T. Kumoi, H. Iida, *Acs Catal.*, 2017, **7**, 4986-4989.
- (S5) J. Zelenka, T. Hartman, K. Klimova, F. Hampl, R. Cibulka, *ChemCatChem*, 2014, **6**, 2843-2846.
- (S6) W. S. Li, N. J. Zhang, L. M. Sayre, *Tetrahedron*, 2001, **57**, 4507-4522.
- (S7) B. Yi, N. Yan, N. N. Yi, Y. J. Xie, X. Y. Wen, C. T. Au, D. H. Lan, *Rsc Adv.*, 2019, **9**, 29721-29725.
- (S8) B. Huang, Y. Chen, X. Zhang and M. Yan, *Eur. J. Org. Chem.*, 2021, **2021**, 3015-3022.
- (S9) Z. P. Li, D. S. Bohle, C. J. Li, *Proc. Natl. Acad. Sci. U. St. A.*, 2006, **103**, 8928-8933.
- (S10) L. Huang and J. Z. Zhao, *Chem. Commun.*, 2013, **49**, 3751-3753.
- (S11) H. Miyake and H. Iida, *Adv. Synth. Catal.*, 2024, **366**, 402-407.
- (S12) T. Mizushima, M. Oka, Y. Imada and H. Iida, *Adv. Synth. Catal.*, 2022, **364**, 2443-2448.
- (S13) L. Möhlmann, M. Baar, J. Riess, M. Antonietti, X. C. Wang, S. Blechert, *Adv. Synth. Catal.*, 2012, **354**, 1909-1913.
- (S14) C. Lin, P. W. Li and L. Wang, *Tetrahedron Lett.*, 2021, **73**.
- (S15) H. M. Huang, Y. J. Li, Q. Ye, W. B. Yu, L. Han, J. H. Jia and J. R. Gao, *J. Org. Chem.*, 2014, **79**, 1084-1092.
